# Supplementary material for: Unusual isostructural Br/I substitution effect on the crystal structure and optical properties of hybrid halobismuthates
Source: Royal Society of Chemistry journal article supplement (doi:10.1039/d2nj05184b), 2023-01-01
Supplement: d2nj05184b1.pdf [file d2nj05184b1.pdf]

**Supplementary materials**

New Journal of Chemistry

**Unusual isostructural Br/I substitution effect on the crystal structure and optical properties of hybrid halobismuthates**

Vitalii Yu. Kotov,<sup>ab</sup> Ivan S. Lunkov,<sup>a</sup> Petr A. Buikin,<sup>\*ab</sup> Sergey Yu. Kottsov,<sup>b</sup> Alexander A. Korlyukov<sup>cd</sup>  
and Alexander Yu. Rudenko<sup>e</sup>

<sup>a</sup>*HSE University, 101000 Moscow, Russian Federation. E-mail: peterzzz@mail.ru*

<sup>b</sup>*N. S. Kurnakov Institute of General and Inorganic Chemistry, Russian Academy of Sciences, 119991 Moscow, Russian Federation.*

<sup>c</sup>*A. N. Nesmeyanov Institute of Organoelement Compounds, Russian Academy of Sciences, 119991 Moscow, Russian Federation*

<sup>d</sup>*Higher Chemical College RAS, D. I. Mendeleev University of Chemical Technology of Russia, 125047 Moscow, Russian Federation*

<sup>e</sup>*Faculty of Chemistry, Moscow State University, 119991 Moscow, Russian Federation*

\*Author for correspondence: peterzzz@mail.ru

## Table of content

|                                                                                                                                                                                                               |           |
|---------------------------------------------------------------------------------------------------------------------------------------------------------------------------------------------------------------|-----------|
| <b>Table S1.</b> Crystal data and structure refinement for <b>2-5</b> .....                                                                                                                                   | <b>4</b>  |
| <b>Table S2.</b> Details of Pawley refinement of PXRD profiles of 1-10 solid solutions .....                                                                                                                  | <b>5</b>  |
| <b>Table S3.</b> The occupancy of different type halogen positions in the crystal structures of mixed hybrid bromo/iodobismuthates.....                                                                       | <b>6</b>  |
| <b>Table S4.</b> CHN elemental analysis of 1-10.....                                                                                                                                                          | <b>7</b>  |
| <b>Fig. S1.</b> <sup>1</sup> H NMR spectra of [4-Pi <sub>2</sub> C <sub>2</sub> ]Br <sub>2</sub> .....                                                                                                        | <b>8</b>  |
| <b>Fig. S2.</b> <sup>13</sup> C NMR spectra of [4-Pi <sub>2</sub> C <sub>2</sub> ]Br <sub>2</sub> .....                                                                                                       | <b>8</b>  |
| <b>Fig. S3-12.</b> EDX spectra of solid solutions 1-10.....                                                                                                                                                   | <b>9</b>  |
| <b>Fig. S13.</b> Fragments of crystal structures <b>3-5</b> .....                                                                                                                                             | <b>14</b> |
| <b>Fig. S14.</b> Dependence of crystal unit cell volume on the composition of the [4-Pi <sub>2</sub> C <sub>2</sub> ] <sub>2</sub> [Bi <sub>2</sub> Br <sub>10-x</sub> I <sub>x</sub> ] solid solutions ..... | <b>15</b> |
| <b>Fig. S15.</b> Pawley refinement profiles for 1-10 solid solutions .....                                                                                                                                    | <b>19</b> |
| <b>Fig. S16.</b> Tauc plots of 1-10 solid solutions .....                                                                                                                                                     | <b>24</b> |
| <b>Fig. S17.</b> Dependence of crystal lattice parameters on the composition of three model compounds [4-Pi <sub>2</sub> C <sub>2</sub> ] <sub>2</sub> [Bi <sub>2</sub> Br <sub>8</sub> I <sub>2</sub> ]..... | <b>27</b> |
| <b>Fig. S18.</b> Density of states of 1, 4 <sub>br</sub> , 1 <sub>tr/br</sub> , 3 <sub>tr</sub> and 10.....                                                                                                   | <b>30</b> |
| <b>Fig. S19.</b> Crystals of solid solutions 1-5 and 10.....                                                                                                                                                  | <b>33</b> |

**Table S1.** Crystal data and structure refinement for **2-5**.

|                                                | <b>2</b>                                                                              | <b>3</b>                                                                              | <b>4</b>                                                                              | <b>5</b>                                                                              |
|------------------------------------------------|---------------------------------------------------------------------------------------|---------------------------------------------------------------------------------------|---------------------------------------------------------------------------------------|---------------------------------------------------------------------------------------|
| Identification code                            | <b>2</b>                                                                              | <b>3</b>                                                                              | <b>4</b>                                                                              | <b>5</b>                                                                              |
| Empirical formula                              | C <sub>14</sub> H <sub>18</sub> BiBr <sub>4.39</sub> I <sub>0.61</sub> N <sub>2</sub> | C <sub>14</sub> H <sub>18</sub> BiBr <sub>4.06</sub> I <sub>0.94</sub> N <sub>2</sub> | C <sub>14</sub> H <sub>18</sub> BiBr <sub>3.78</sub> I <sub>1.22</sub> N <sub>2</sub> | C <sub>14</sub> H <sub>18</sub> BiBr <sub>3.41</sub> I <sub>1.59</sub> N <sub>2</sub> |
| Formula weight                                 | 851.61                                                                                | 867.12                                                                                | 880.04                                                                                | 897.43                                                                                |
| Temperature, K                                 | 100                                                                                   | 100                                                                                   | 140                                                                                   | 100                                                                                   |
| Wavelength, Å                                  | 0.71073                                                                               | 0.71073                                                                               | 0.71073                                                                               | 0.71073                                                                               |
| Crystal system                                 | Monoclinic                                                                            | Monoclinic                                                                            | Monoclinic                                                                            | Monoclinic                                                                            |
| Space group                                    | P2 <sub>1</sub> /n                                                                    | P2 <sub>1</sub> /n                                                                    | P2 <sub>1</sub> /n                                                                    | P2 <sub>1</sub> /n                                                                    |
| a, Å                                           | 12.0767(8)                                                                            | 12.1086(4)                                                                            | 12.168(3)                                                                             | 12.1996(7)                                                                            |
| b, Å                                           | 11.5480(9)                                                                            | 11.5295(4)                                                                            | 11.602(3)                                                                             | 11.5845(8)                                                                            |
| c, Å                                           | 14.9324(10)                                                                           | 15.0033(6)                                                                            | 15.055(4)                                                                             | 15.0730(11)                                                                           |
| α, °                                           | 90                                                                                    | 90                                                                                    | 90                                                                                    | 90                                                                                    |
| β, °                                           | 92.349(3)                                                                             | 92.440(2)                                                                             | 92.439(6)                                                                             | 92.533(5)                                                                             |
| γ, °                                           | 90                                                                                    | 90                                                                                    | 90                                                                                    | 90                                                                                    |
| Volume, Å <sup>3</sup>                         | 2080.7(3)                                                                             | 2092.65(13)                                                                           | 2123.5(9)                                                                             | 2128.1(2)                                                                             |
| Z                                              | 4                                                                                     | 4                                                                                     | 4                                                                                     | 4                                                                                     |
| D (calc), mg/m <sup>3</sup>                    | 2.719                                                                                 | 2.752                                                                                 | 2.753                                                                                 | 2.801                                                                                 |
| μ, mm <sup>-1</sup>                            | 17.805                                                                                | 17.561                                                                                | 17.188                                                                                | 16.993                                                                                |
| F(000)                                         | 1540                                                                                  | 1564                                                                                  | 1584                                                                                  | 1610                                                                                  |
| Crystal size, mm                               | 0.002 × 0.01 × 0.05                                                                   | 0.004 × 0.015 × 0.09                                                                  | 0.01 × 0.02 × 0.12                                                                    | 0.004 × 0.015 × 0.10                                                                  |
| θ range, °                                     | 2.127, 26.012                                                                         | 2.118, 27.102                                                                         | 2.109, 26.068                                                                         | 2.103, 26.022                                                                         |
| Index ranges                                   | -14 ≤ h ≤ 14<br>-12 ≤ k ≤ 14<br>-18 ≤ l ≤ 18                                          | -15 ≤ h ≤ 15<br>-14 ≤ k ≤ 14<br>-11 ≤ l ≤ 19                                          | -13 ≤ h ≤ 15<br>-14 ≤ k ≤ 14<br>-18 ≤ l ≤ 18                                          | -15 ≤ h ≤ 15<br>-13 ≤ k ≤ 14<br>-13 ≤ l ≤ 18                                          |
| Reflections collected                          | 14073                                                                                 | 16052                                                                                 | 12550                                                                                 | 15210                                                                                 |
| Independent reflections, R <sub>int</sub>      | 4091, 0.0590                                                                          | 4621, 0.0588                                                                          | 4189, 0.0962                                                                          | 4193, 0.0733                                                                          |
| Completeness to θ = 25.242°                    | 99.8 %                                                                                | 100 %                                                                                 | 99.9 %                                                                                | 100 %                                                                                 |
| Absorption correction                          | Semi-empirical<br>from equivalents                                                    | Semi-empirical<br>from equivalents                                                    | Semi-empirical<br>from equivalents                                                    | Semi-empirical<br>from equivalents                                                    |
| Max., min. transmission                        | 0.0955, 0.0575                                                                        | 0.0473, 0.0196                                                                        | 0.0192, 0.0037                                                                        | 0.0210, 0.0043                                                                        |
| Refinement method                              | Full-matrix<br>least-squares on F <sup>2</sup>                                        |
| Data / restraints / parameters                 | 4091 / 8 / 217                                                                        | 4621 / 2 / 213                                                                        | 4189 / 1 / 214                                                                        | 4193 / 8 / 213                                                                        |
| Goodness-of-fit                                | 1.092                                                                                 | 1.025                                                                                 | 0.914                                                                                 | 1.007                                                                                 |
| R1, wR2 [I > 2σ(I)]                            | 0.0386, 0.0574                                                                        | 0.0386, 0.0780                                                                        | 0.0472, 0.0892                                                                        | 0.0564, 0.1334                                                                        |
| R1, wR2 (all data)                             | 0.0543, 0.0609                                                                        | 0.0608, 0.0852                                                                        | 0.1076, 0.1061                                                                        | 0.0853, 0.1487                                                                        |
| Largest diff. peak and hole, e.Å <sup>-3</sup> | 1.177, -1.193                                                                         | 1.757, -1.176                                                                         | 1.129, -1.284                                                                         | 2.439, -1.623                                                                         |

**Table S2.** Details of Powley refinement of PXRD profiles of 1-10 solid solutions.

| <b>Compound</b> | <b>a, Å</b> | <b>b, Å</b> | <b>c, Å</b> | <b><math>\beta</math>, °</b> | <b>V, Å<sup>3</sup></b> | <b>R-Bragg, %</b> | <b>R<sub>exp</sub>, %</b> | <b>R<sub>wp</sub>, %</b> | <b>R<sub>p</sub>, %</b> | <b>GOF, %</b> |
|-----------------|-------------|-------------|-------------|------------------------------|-------------------------|-------------------|---------------------------|--------------------------|-------------------------|---------------|
| 1               | 12.0626(1)  | 11.6717(2)  | 14.9214(1)  | 92.0631(6)                   | 2099.42(4)              | 0.133             | 2.65                      | 3.56                     | 2.52                    | 1.35          |
| 2               | 12.1262(3)  | 11.6614(3)  | 15.0264(3)  | 92.1605(15)                  | 2123.35(9)              | 0.203             | 2.65                      | 4.08                     | 2.96                    | 1.54          |
| 3               | 12.1803(17) | 11.6713(16) | 15.1184(15) | 92.261(6)                    | 2147.6(5)               | 0.369             | 2.22                      | 4.59                     | 3.26                    | 2.07          |
| 4               | 12.2390(19) | 11.6992(18) | 15.2016(18) | 92.291(6)                    | 2174.9(5)               | 0.228             | 2.26                      | 4.07                     | 3.03                    | 1.80          |
| 5               | 12.2913(18) | 11.7415(17) | 15.2611(17) | 92.274(6)                    | 2200.7(5)               | 0.129             | 2.38                      | 3.45                     | 2.65                    | 1.45          |
| 6               | 12.2875(5)  | 11.7337(5)  | 15.2639(5)  | 92.286(2)                    | 2198.97(15)             | 0.140             | 2.78                      | 3.74                     | 2.95                    | 1.34          |
| 7               | 12.3515(5)  | 11.7946(6)  | 15.3236(7)  | 92.283(3)                    | 2230.59(17)             | 0.157             | 2.84                      | 4.26                     | 3.30                    | 1.50          |
| 8               | 12.3766(6)  | 11.8336(7)  | 15.3452(8)  | 92.275(4)                    | 2245.7(2)               | 0.169             | 2.98                      | 4.44                     | 3.44                    | 1.49          |
| 9               | 12.4009(5)  | 11.8825(6)  | 15.3489(6)  | 92.317(3)                    | 2259.86(17)             | 0.162             | 2.92                      | 4.11                     | 3.01                    | 1.41          |
| 10              | 12.6440(3)  | 12.3105(3)  | 15.3812(3)  | 92.6824(12)                  | 2391.52(9)              | 0.146             | 3.59                      | 3.99                     | 3.02                    | 1.11          |

**Table S3.** The occupancy of different type halogen positions in the crystal structures of mixed hybrid bromo/iodobismuthates.

| Refcode | Anion                           | Iodine content |             |           |
|---------|---------------------------------|----------------|-------------|-----------|
|         |                                 | bridge         | term/bridge | term/term |
| CEHSIT  | BiX <sub>5</sub>                | 1              | -           | 0.50      |
| COZXEX  | BiX <sub>4</sub>                | 0.91           | 0.71        | -         |
| JAJFAC  | BiX <sub>5</sub>                | 0.00           | 0.71        | 0.14      |
| EGEGUV  | Bi <sub>2</sub> X <sub>9</sub>  | 0.48           | 0.40        | -         |
| TOVFAO  | Bi <sub>2</sub> X <sub>9</sub>  | 0.44           | 0.28        | -         |
|         | Bi <sub>2</sub> X <sub>9</sub>  | 0.19           | 0.27        | -         |
| TOVFES  | Bi <sub>2</sub> X <sub>9</sub>  | 0.34           | 0.29        | -         |
| TOVFIW  | Bi <sub>2</sub> X <sub>9</sub>  | 0.31           | 0.24        | -         |
| TOVFOC  | Bi <sub>2</sub> X <sub>10</sub> | 0.13           | 0.32        | 0.27      |

**Table S4.** CHN elemental analysis of 1-10. The molar fraction of iodine ( $I_{CHN} = \frac{I, \%}{I, \% + Br, \%}$ ) was calculated on CHN carbon atoms concentration.

| Solid solution | Molecular mass | Calculated |        |        | Experimental |        |        | $I_{CHN}, \%$ | $I_{EDX}, \%$ |
|----------------|----------------|------------|--------|--------|--------------|--------|--------|---------------|---------------|
|                |                | C          | N      | H      | C            | N      | H      |               |               |
| 1              | 1648.43        | 0.2040     | 0.0340 | 0.0220 | 0.2035       | 0.0339 | 0.0228 | 1.3           | 0.6           |
| 2              | 1690.73        | 0.1989     | 0.0331 | 0.0215 | 0.1990       | 0.0326 | 0.0212 | 9.2           | 9.6           |
| 3              | 1740.55        | 0.1932     | 0.0322 | 0.0208 | 0.1936       | 0.0316 | 0.0216 | 19.3          | 20.2          |
| 4              | 1772.51        | 0.1897     | 0.0316 | 0.0205 | 0.1893       | 0.0313 | 0.0219 | 27.7          | 27.0          |
| 5              | 1844.43        | 0.1823     | 0.0304 | 0.0197 | 0.1825       | 0.0304 | 0.0196 | 41.7          | 42.3          |
| 6              | 1824.22        | 0.1844     | 0.0307 | 0.0199 | 0.1843       | 0.0310 | 0.0191 | 37.9          | 38.0          |
| 7              | 1881.56        | 0.1787     | 0.0298 | 0.0193 | 0.1774       | 0.0301 | 0.0193 | 53.0          | 50.2          |
| 8              | 1906.94        | 0.1764     | 0.0294 | 0.0190 | 0.1734       | 0.0298 | 0.0189 | 62.3          | 55.6          |
| 9              | 1926.68        | 0.1745     | 0.0291 | 0.0188 | 0.1677       | 0.0283 | 0.0167 | 76.3          | 59.8          |
| 10             | 2110.45        | 0.1593     | 0.0265 | 0.0172 | 0.1608       | 0.0261 | 0.0166 | 94.7          | 98.9          |

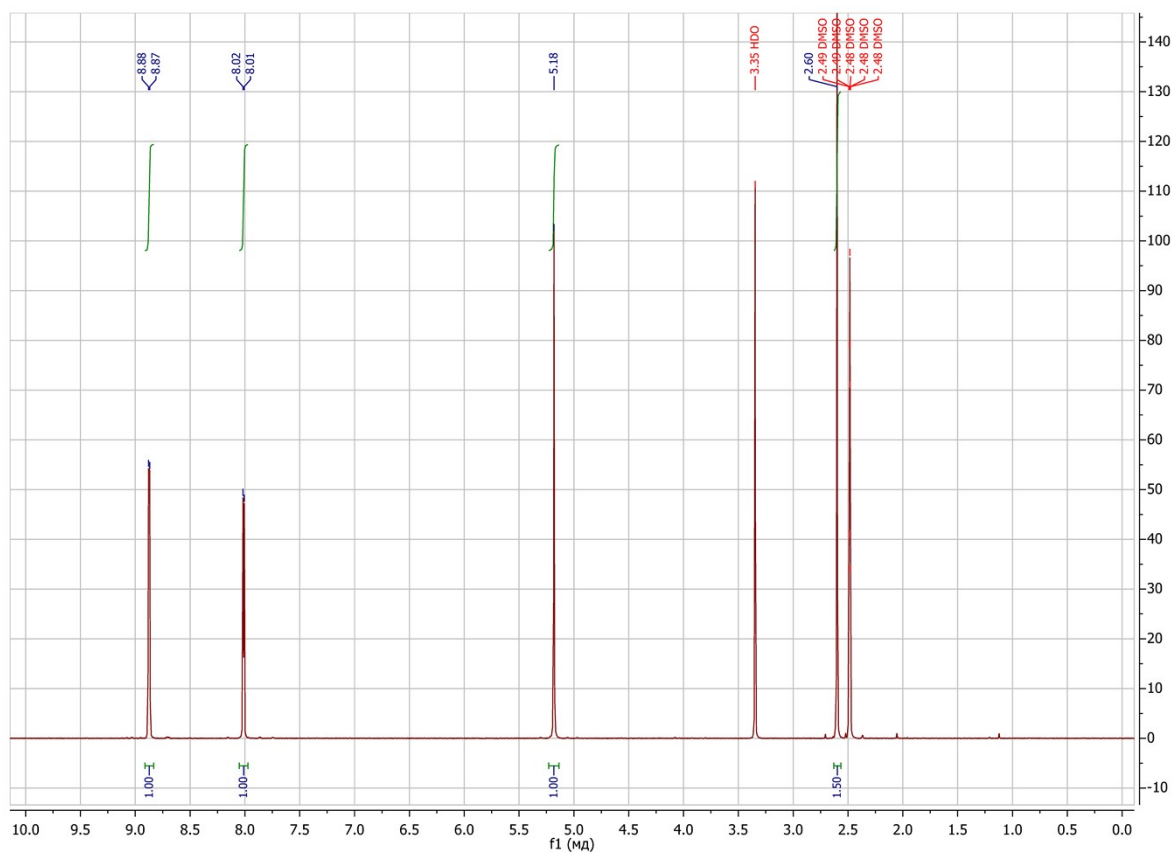

Fig. S1. <sup>1</sup>H NMR spectra of [4-Pi<sub>2</sub>C<sub>2</sub>]Br<sub>2</sub>.

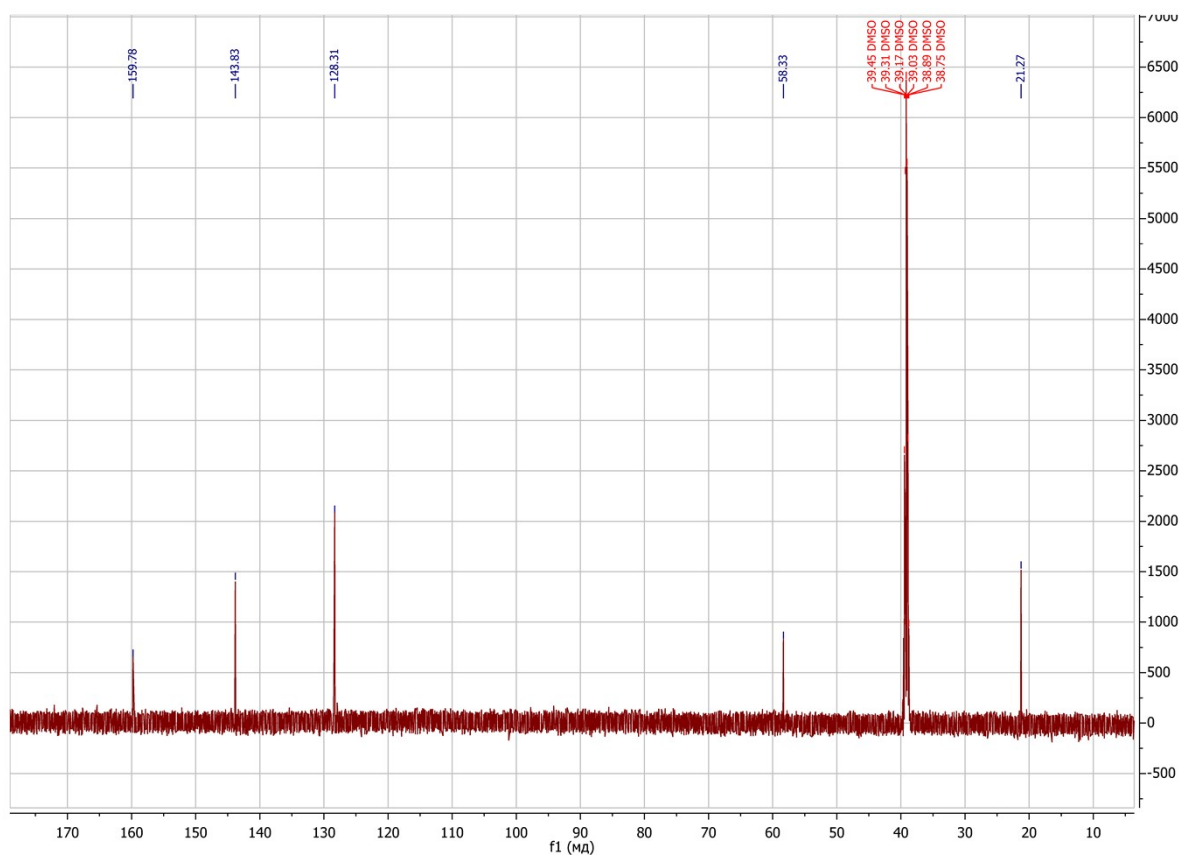

Fig. S2. <sup>13</sup>C NMR spectra of [4-Pi<sub>2</sub>C<sub>2</sub>]Br<sub>2</sub>.

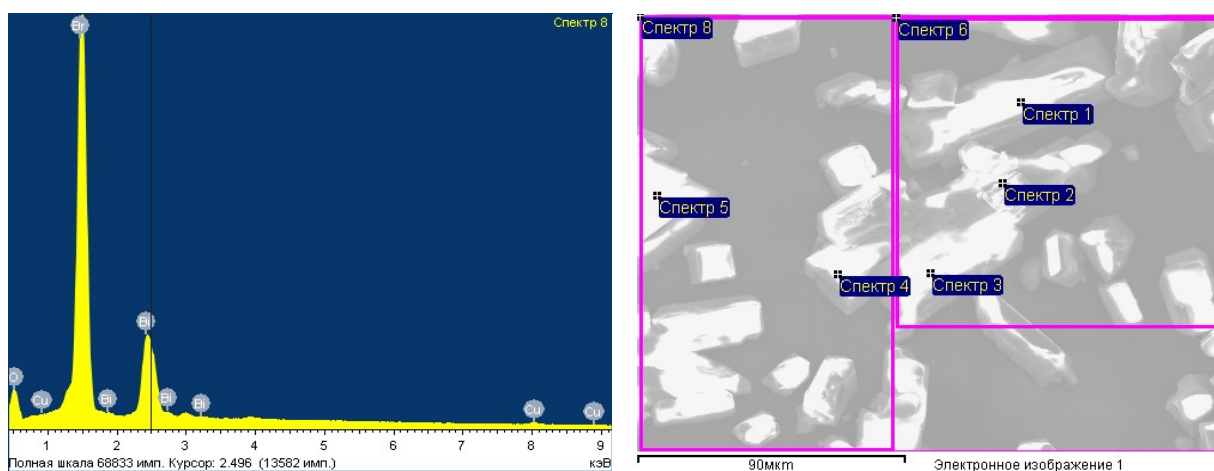

| Spectra           | C, at%       | Br, at%     | I, at%      | Bi, at%     |
|-------------------|--------------|-------------|-------------|-------------|
| Spectrum 1        | 79.52        | 16.87       | 0.12        | 3.49        |
| Spectrum 2        | 81.15        | 15.65       | 0.10        | 3.11        |
| Spectrum 3        | 78.50        | 17.92       | 0.11        | 3.48        |
| Spectrum 4        | 78.03        | 18.04       | 0.13        | 3.80        |
| Spectrum 5        | 78.64        | 17.57       | 0.12        | 3.67        |
| Spectrum 6        | 94.92        | 4.31        | 0.02        | 0.75        |
| Spectrum 7        | 96.77        | 2.75        | 0.02        | 0.46        |
| <b>Spectrum 8</b> | <b>96.07</b> | <b>3.34</b> | <b>0.02</b> | <b>0.57</b> |

Fig. S3. EDX spectra of solid solution 1.

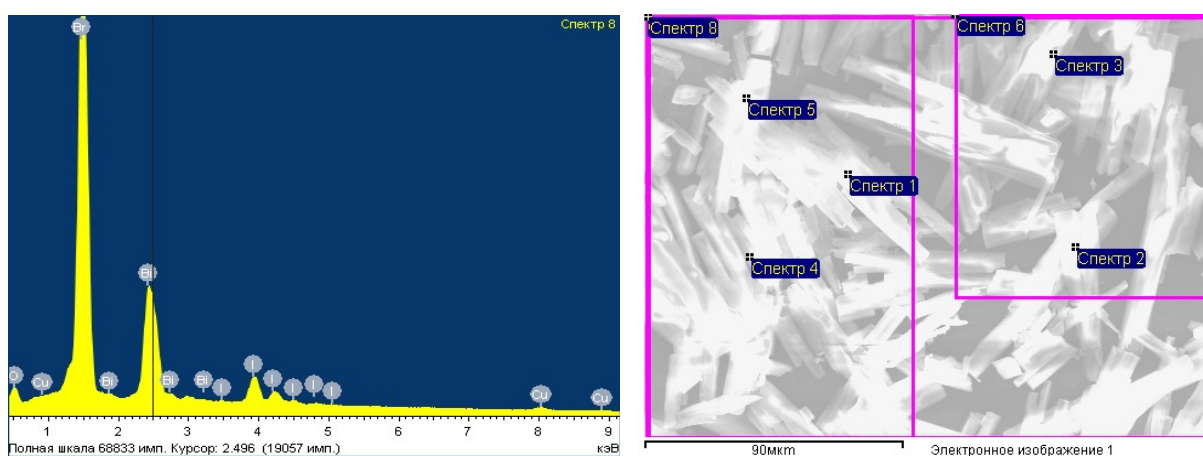

| Spectra           | C, at%       | Br, at%     | I, at%      | Bi, at%     |
|-------------------|--------------|-------------|-------------|-------------|
| Spectrum 1        | 89.33        | 8.02        | 0.93        | 1.72        |
| Spectrum 2        | 75.22        | 18.06       | 2.52        | 4.21        |
| Spectrum 3        | 74.92        | 18.15       | 2.65        | 4.29        |
| Spectrum 4        | 64.48        | 26.85       | 2.80        | 5.86        |
| Spectrum 5        | 78.98        | 16.08       | 1.47        | 3.47        |
| Spectrum 6        | 92.66        | 5.59        | 0.61        | 1.14        |
| Spectrum 7        | 91.71        | 6.32        | 0.67        | 1.29        |
| <b>Spectrum 8</b> | <b>93.23</b> | <b>5.16</b> | <b>0.55</b> | <b>1.05</b> |

Fig. S4. EDX spectra of solid solution 2.



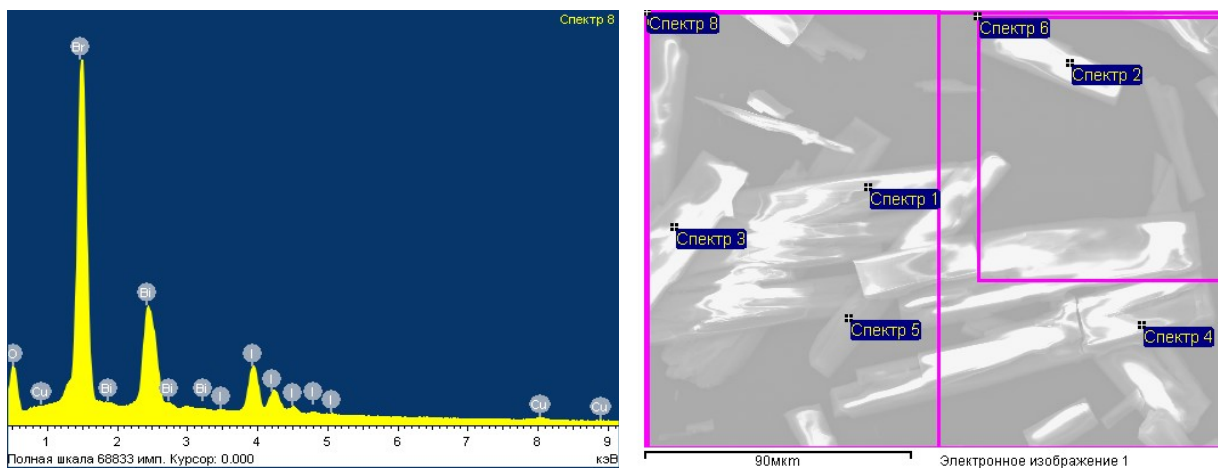

| Spectra           | C, at%       | Br, at%     | I, at%      | Bi, at%     |
|-------------------|--------------|-------------|-------------|-------------|
| Spectrum 1        | 78.24        | 14.89       | 3.12        | 3.75        |
| Spectrum 2        | 84.53        | 10.08       | 2.64        | 2.75        |
| Spectrum 3        | 81.13        | 12.93       | 2.67        | 3.27        |
| Spectrum 4        | 79.90        | 14.02       | 2.57        | 3.51        |
| Spectrum 5        | 76.32        | 16.07       | 3.49        | 4.13        |
| Spectrum 6        | 96.80        | 2.15        | 0.56        | 0.49        |
| Spectrum 7        | 96.05        | 2.71        | 0.64        | 0.61        |
| <b>Spectrum 8</b> | <b>96.21</b> | <b>2.56</b> | <b>0.65</b> | <b>0.58</b> |

Fig. S5. EDX spectra of solid solution 3.

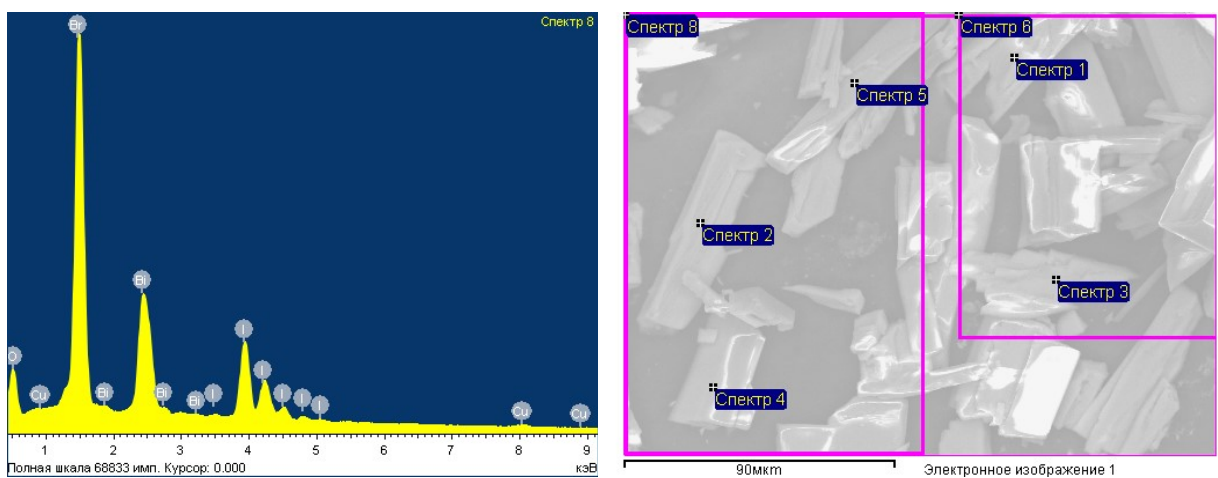

| Spectra           | C, at%       | Br, at%     | I, at%      | Bi, at%     |
|-------------------|--------------|-------------|-------------|-------------|
| Spectrum 1        | 86.82        | 8.06        | 2.93        | 2.19        |
| Spectrum 2        | 80.05        | 12.62       | 3.99        | 3.34        |
| Spectrum 3        | 79.02        | 12.86       | 4.48        | 3.64        |
| Spectrum 4        | 81.35        | 10.67       | 4.79        | 3.20        |
| Spectrum 5        | 81.56        | 11.62       | 3.96        | 2.87        |
| Spectrum 6        | 91.94        | 5.02        | 1.81        | 1.23        |
| Spectrum 7        | 96.31        | 2.28        | 0.88        | 0.53        |
| <b>Spectrum 8</b> | <b>94.81</b> | <b>3.22</b> | <b>1.19</b> | <b>0.78</b> |

Fig. S6. EDX spectra of solid solution 4.

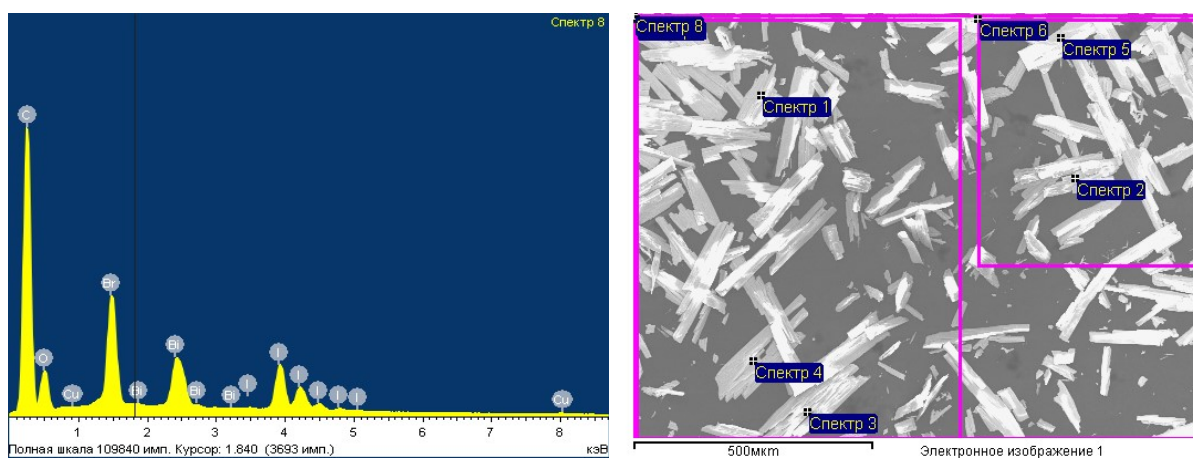

| Spectra           | C, at%       | Br, at%     | I, at%      | Bi, at%     |
|-------------------|--------------|-------------|-------------|-------------|
| Spectrum 1        | 78.52        | 12.82       | 4.99        | 3.67        |
| Spectrum 2        | 70.72        | 14.22       | 9.99        | 5.08        |
| Spectrum 3        | 83.34        | 9.21        | 4.34        | 3.11        |
| Spectrum 4        | 72.85        | 14.02       | 8.24        | 4.88        |
| Spectrum 5        | 79.80        | 10.73       | 5.94        | 3.52        |
| Spectrum 6        | 96.38        | 1.77        | 1.27        | 0.57        |
| Spectrum 7        | 96.13        | 1.87        | 1.38        | 0.62        |
| <b>Spectrum 8</b> | <b>96.43</b> | <b>1.73</b> | <b>1.27</b> | <b>0.57</b> |

Fig. S7. EDX spectra of solid solution 5.

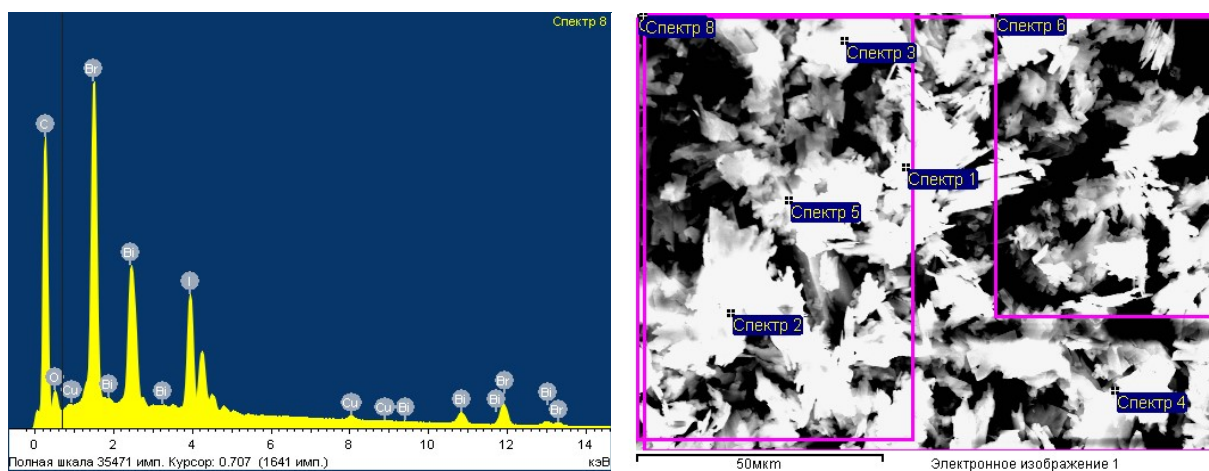

| Spectra           | C, at%       | Br, at%     | I, at%      | Bi, at%     |
|-------------------|--------------|-------------|-------------|-------------|
| Spectrum 1        | 88.59        | 6.22        | 3.32        | 1.86        |
| Spectrum 2        | 88.40        | 6.01        | 3.64        | 1.95        |
| Spectrum 3        | 93.10        | 4.00        | 1.85        | 1.05        |
| Spectrum 4        | 89.78        | 5.46        | 3.07        | 1.69        |
| Spectrum 5        | 83.12        | 9.64        | 4.10        | 3.14        |
| Spectrum 6        | 94.24        | 2.87        | 1.97        | 0.91        |
| Spectrum 7        | 93.38        | 3.51        | 2.05        | 1.06        |
| <b>Spectrum 8</b> | <b>92.76</b> | <b>3.77</b> | <b>2.31</b> | <b>1.16</b> |

Fig. S8. EDX spectra of solid solution 6.

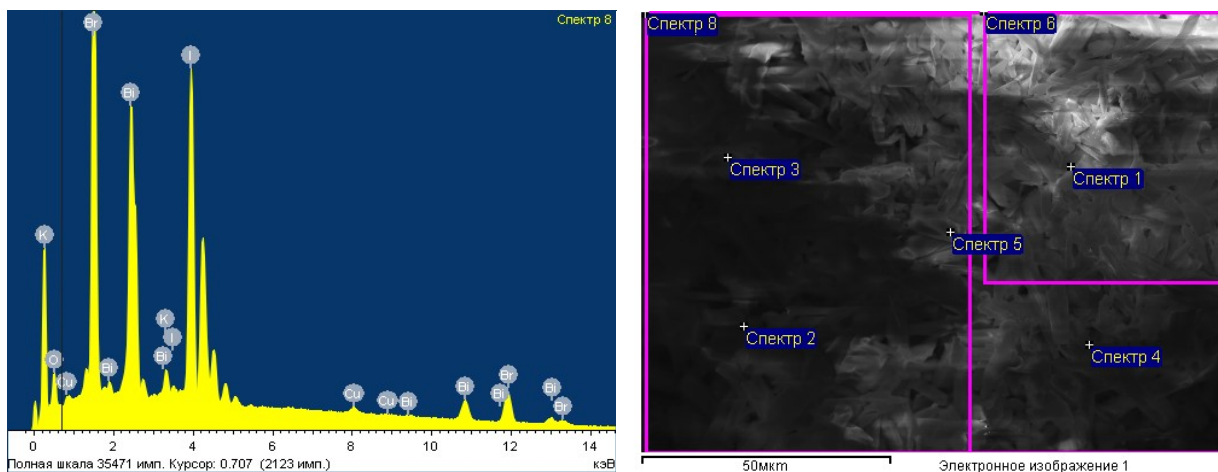

| Spectra           | C, at%       | Br, at%      | I, at%       | Bi, at%     |
|-------------------|--------------|--------------|--------------|-------------|
| Spectrum 1        | 71.95        | 11.44        | 11.96        | 4.66        |
| Spectrum 2        | 38.00        | 20.03        | 31.52        | 10.45       |
| Spectrum 3        | 54.54        | 13.76        | 24.22        | 7.47        |
| Spectrum 4        | 13.38        | 10.29        | 65.32        | 11.00       |
| Spectrum 5        | 32.91        | 15.75        | 41.19        | 10.15       |
| Spectrum 6        | 75.86        | 9.66         | 10.42        | 4.05        |
| Spectrum 7        | 75.39        | 10.46        | 10.08        | 4.07        |
| <b>Spectrum 8</b> | <b>75.31</b> | <b>10.25</b> | <b>10.32</b> | <b>4.12</b> |

Fig. S9. EDX spectra of solid solution 7.

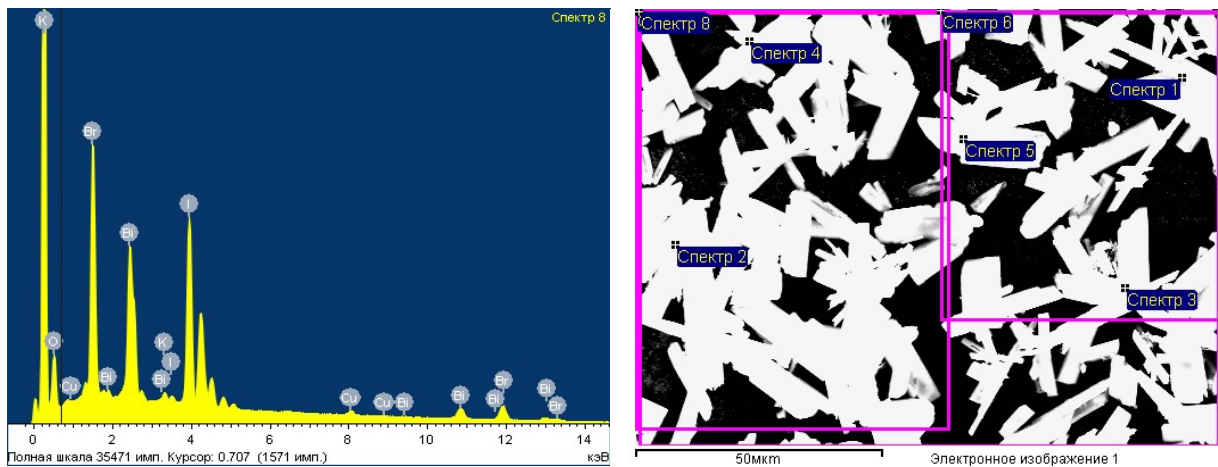

| Spectra           | C, at%       | Br, at%     | I, at%      | Bi, at%     |
|-------------------|--------------|-------------|-------------|-------------|
| Spectrum 1        | 96.25        | 2.20        | 1.02        | 0.53        |
| Spectrum 2        | 92.04        | 2.58        | 4.19        | 1.20        |
| Spectrum 3        | 92.32        | 2.20        | 4.23        | 1.24        |
| Spectrum 4        | 92.24        | 2.89        | 3.49        | 1.37        |
| Spectrum 5        | 83.87        | 6.14        | 7.21        | 2.78        |
| Spectrum 6        | 95.05        | 1.87        | 2.29        | 0.79        |
| Spectrum 7        | 92.50        | 2.75        | 3.55        | 1.21        |
| <b>Spectrum 8</b> | <b>94.06</b> | <b>2.21</b> | <b>2.77</b> | <b>0.95</b> |

Fig. S10. EDX spectra of solid solution 8.

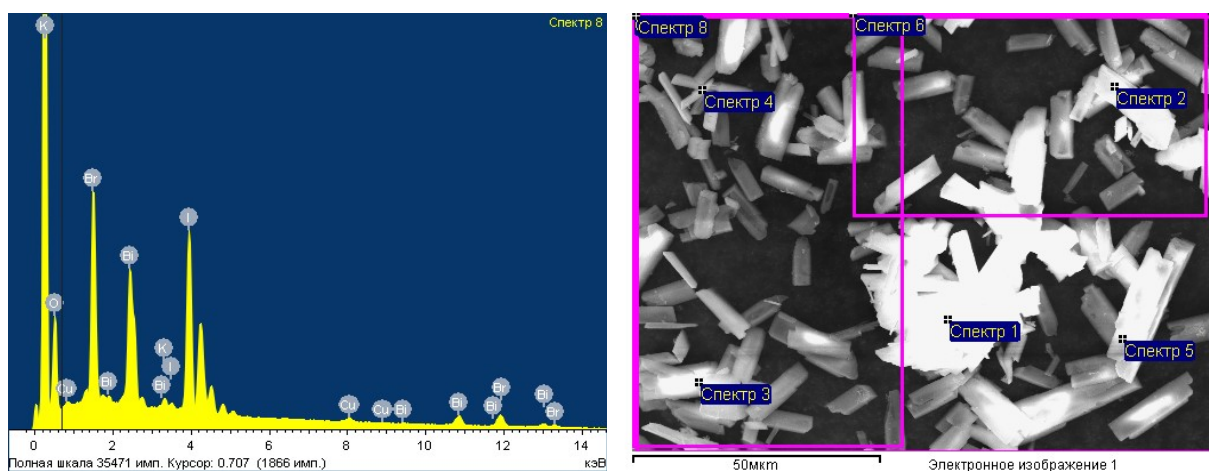

| Spectra           | C, at%       | Br, at%     | I, at%      | Bi, at%     |
|-------------------|--------------|-------------|-------------|-------------|
| Spectrum 1        | 89.07        | 3.09        | 6.08        | 1.76        |
| Spectrum 2        | 84.39        | 4.64        | 7.85        | 3.12        |
| Spectrum 3        | 82.36        | 6.60        | 8.14        | 2.89        |
| Spectrum 4        | 92.98        | 2.74        | 3.09        | 1.19        |
| Spectrum 5        | 83.21        | 6.25        | 7.54        | 3.00        |
| Spectrum 6        | 96.83        | 1.05        | 1.63        | 0.49        |
| Spectrum 7        | 96.45        | 1.27        | 1.73        | 0.55        |
| <b>Spectrum 8</b> | <b>95.95</b> | <b>1.37</b> | <b>2.04</b> | <b>0.64</b> |

Fig. S11. EDX spectra of solid solution 9.

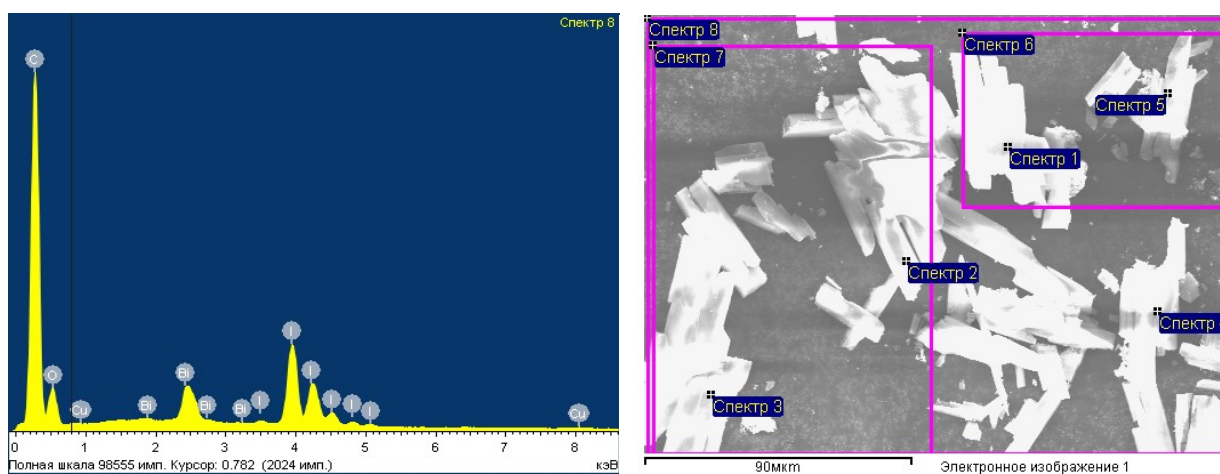

| Spectra           | C, at%       | Br, at%     | I, at%      | Bi, at%     |
|-------------------|--------------|-------------|-------------|-------------|
| Spectrum 1        | 99.87        | 0.01        | 0.10        | 0.02        |
| Spectrum 2        | 98.78        | 0.02        | 1.00        | 0.19        |
| Spectrum 3        | 83.38        | 0.15        | 13.51       | 2.97        |
| Spectrum 4        | 88.59        | 0.09        | 9.73        | 1.58        |
| Spectrum 5        | 84.60        | 0.12        | 12.38       | 2.89        |
| Spectrum 6        | 98.14        | 0.02        | 1.56        | 0.29        |
| Spectrum 7        | 95.95        | 0.03        | 3.40        | 0.62        |
| <b>Spectrum 8</b> | <b>96.70</b> | <b>0.03</b> | <b>2.78</b> | <b>0.49</b> |

Fig. S12. EDX spectra of solid solution 10.



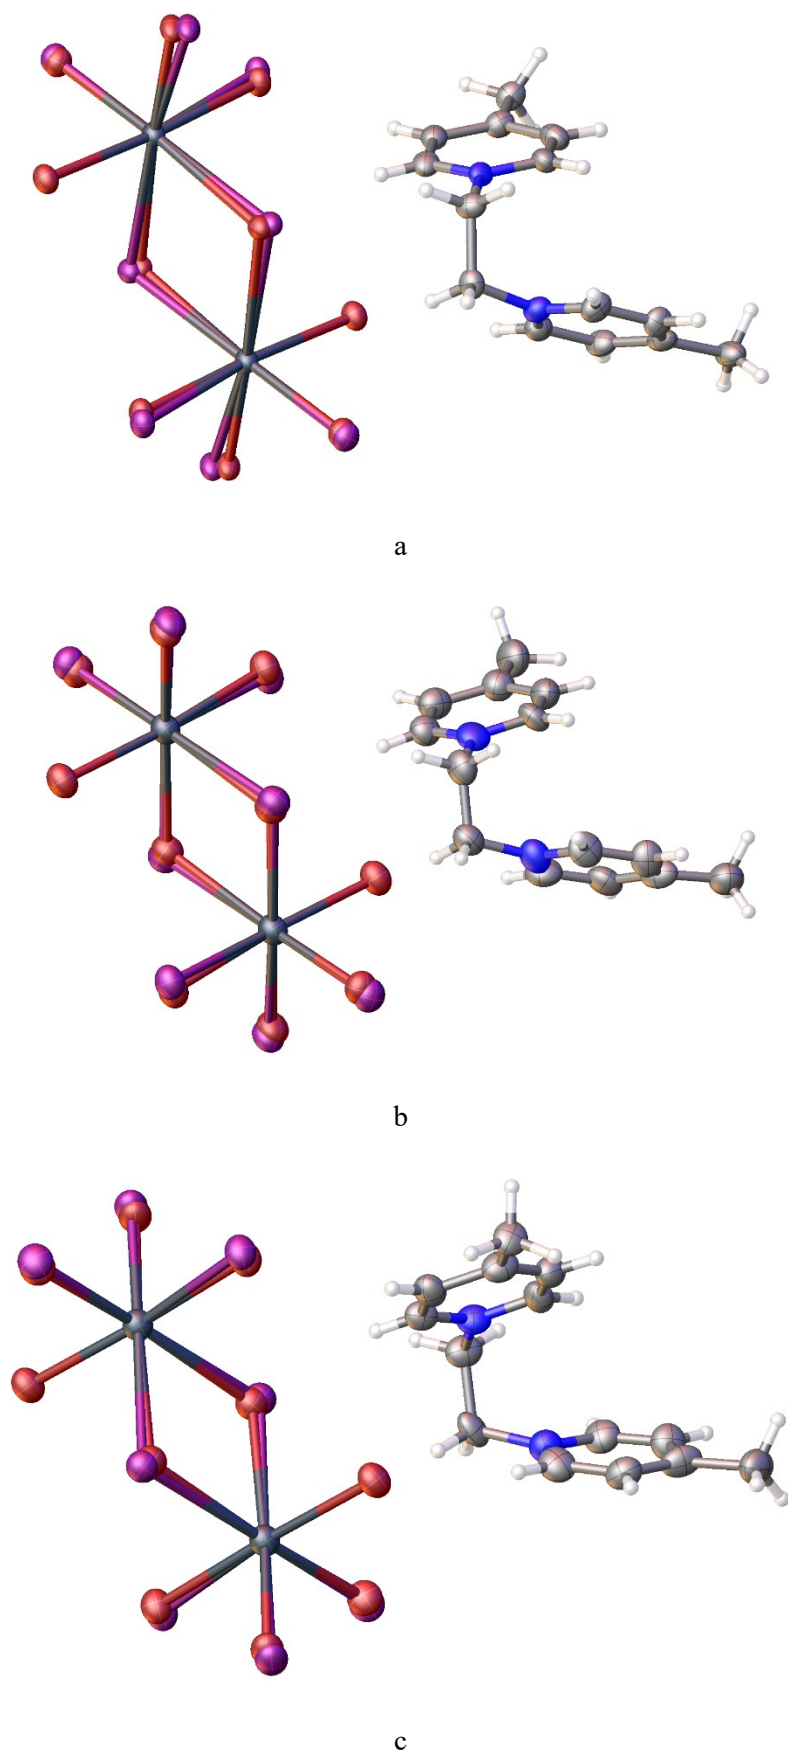

**Fig. S13.** Fragments of crystal structures **3** (a), **4** (b) and **5** (c).

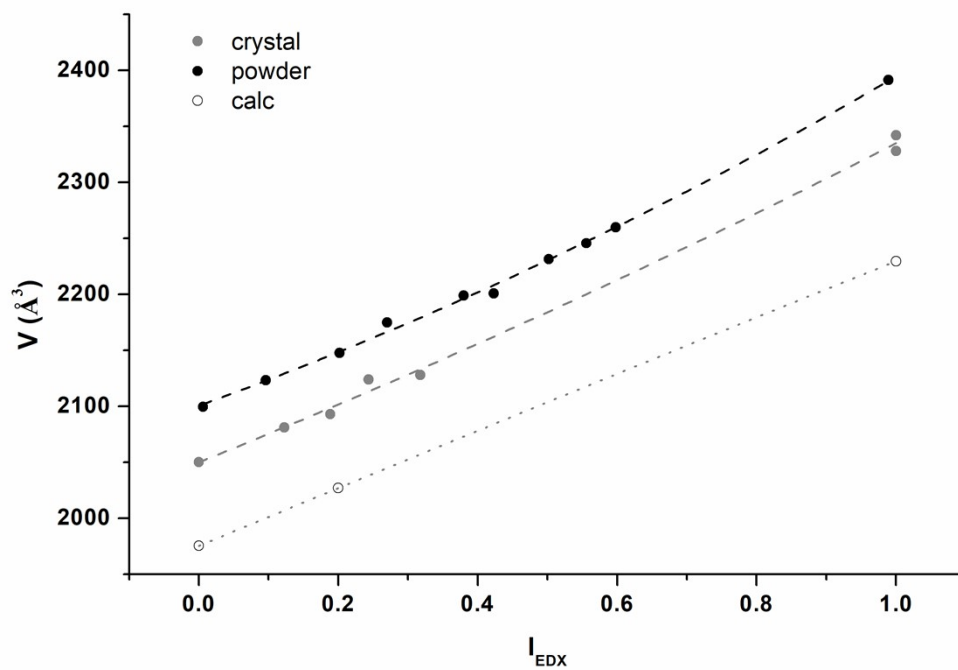

**Fig. S14.** Dependence of crystal unit cell volume on the composition of the  $[4\text{-Pi}_2\text{C}_2]_2[\text{Bi}_2\text{Br}_{10-x}\text{I}_x]$  solid solutions. The difference in the volume values for different methods is due to the different temperature of the experiments (PXRD (powder) – RT, XRD (crystal) – 100-140K, calculation – 0K). Fitting curves are shown for visual convenience and have no physical sense.

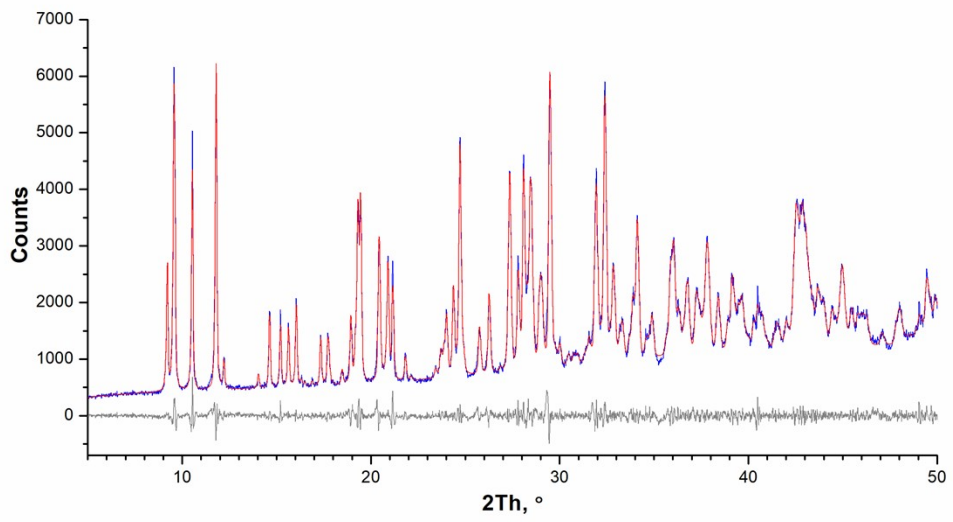

a

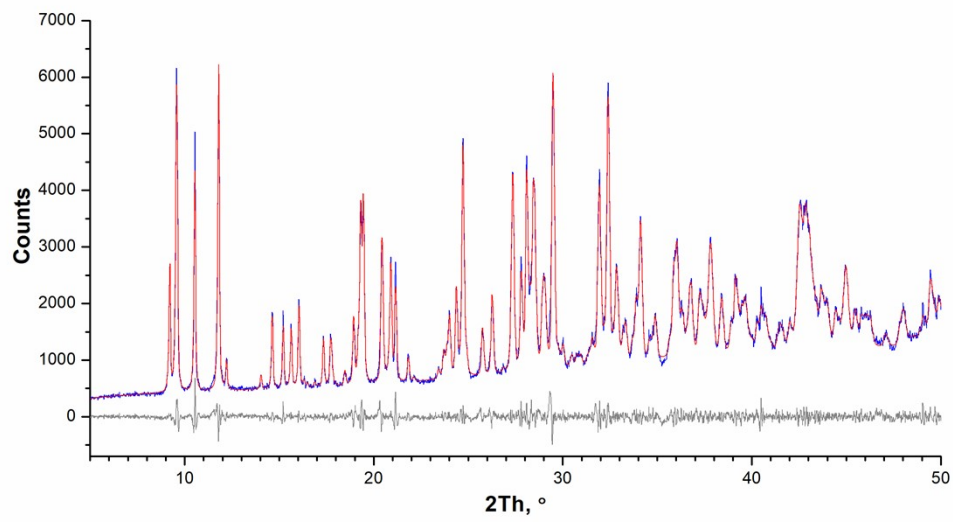

b

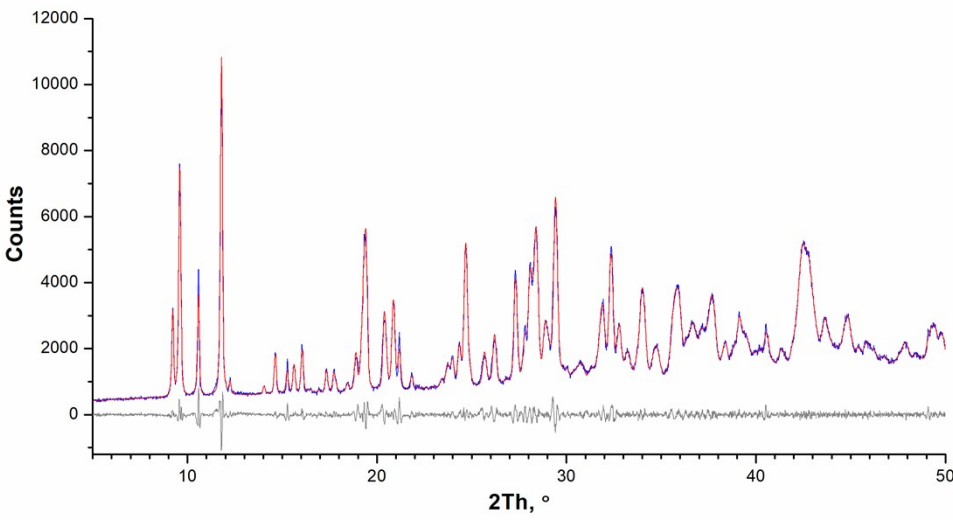

c

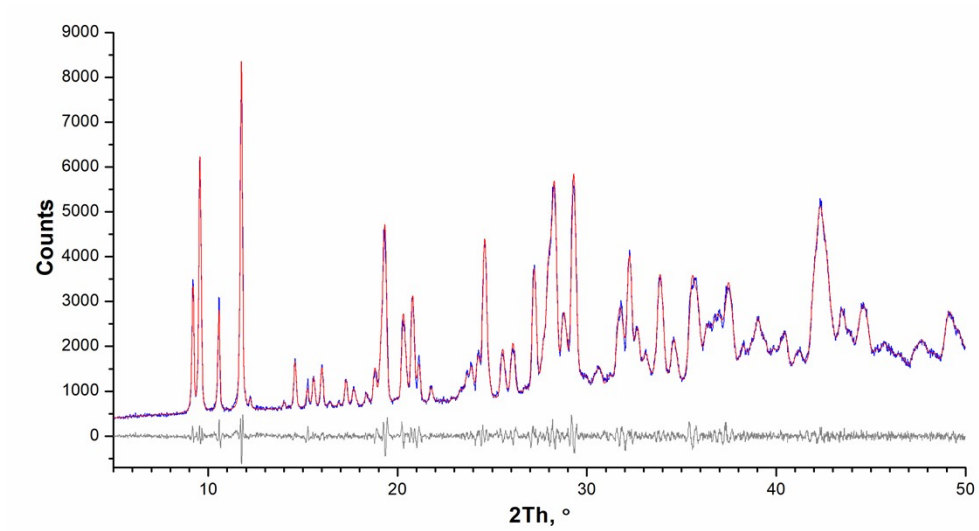

d

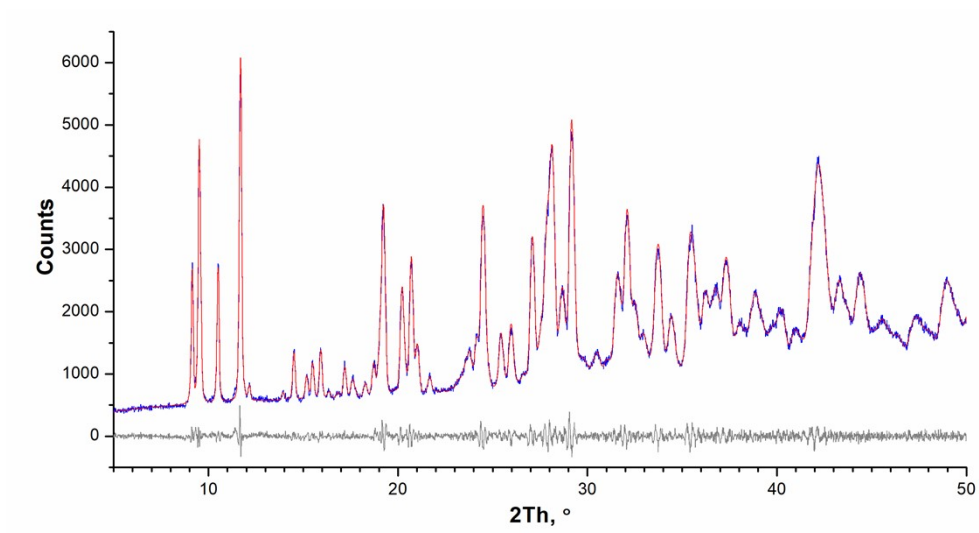

e

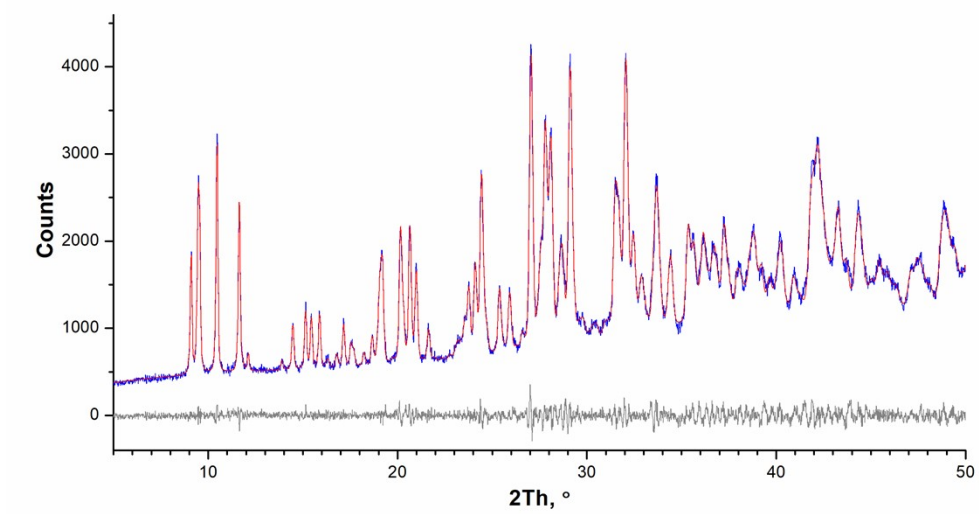

f



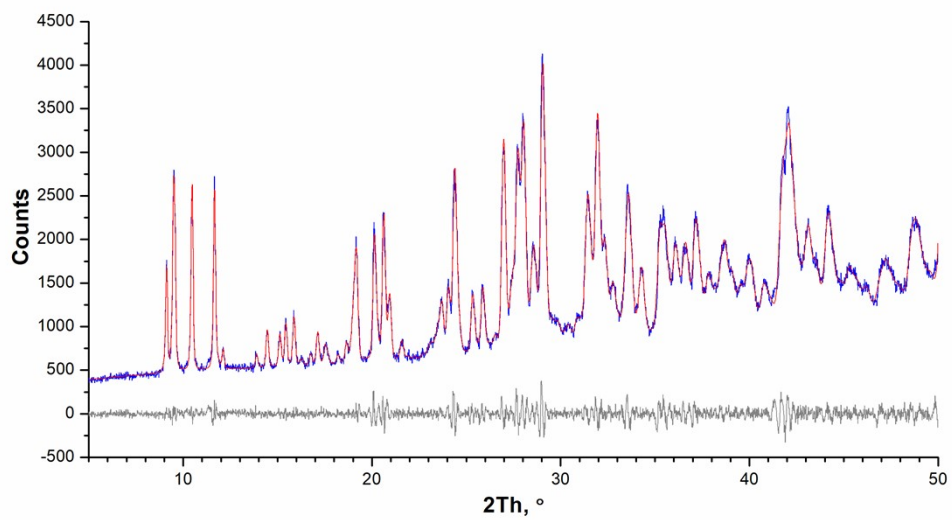

g

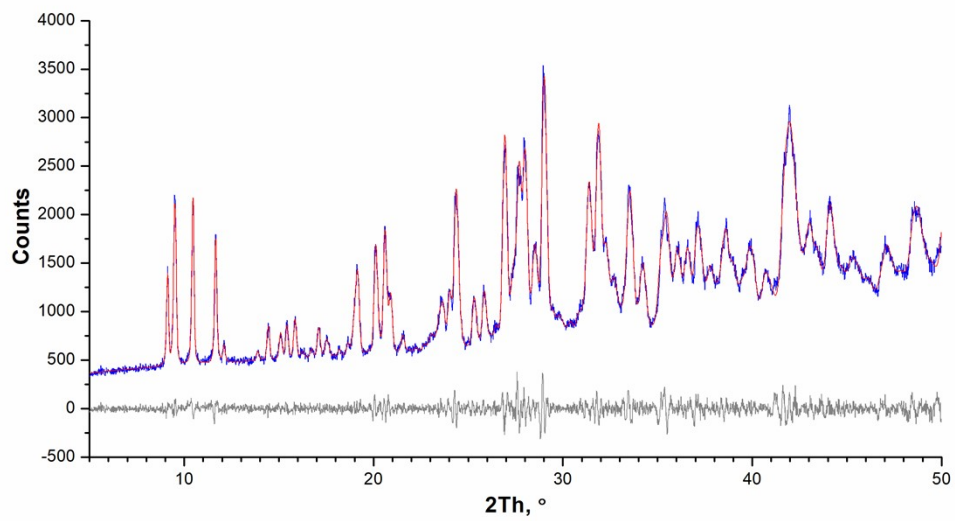

h

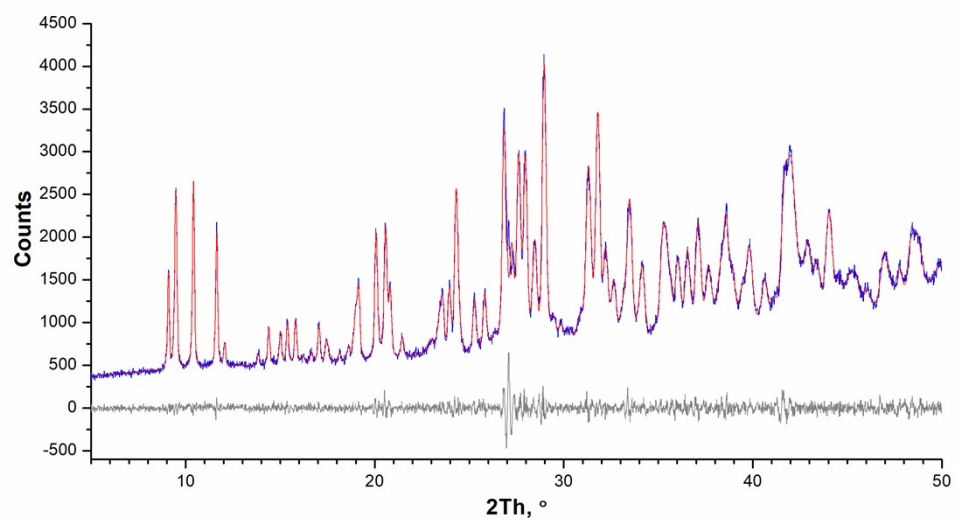

i

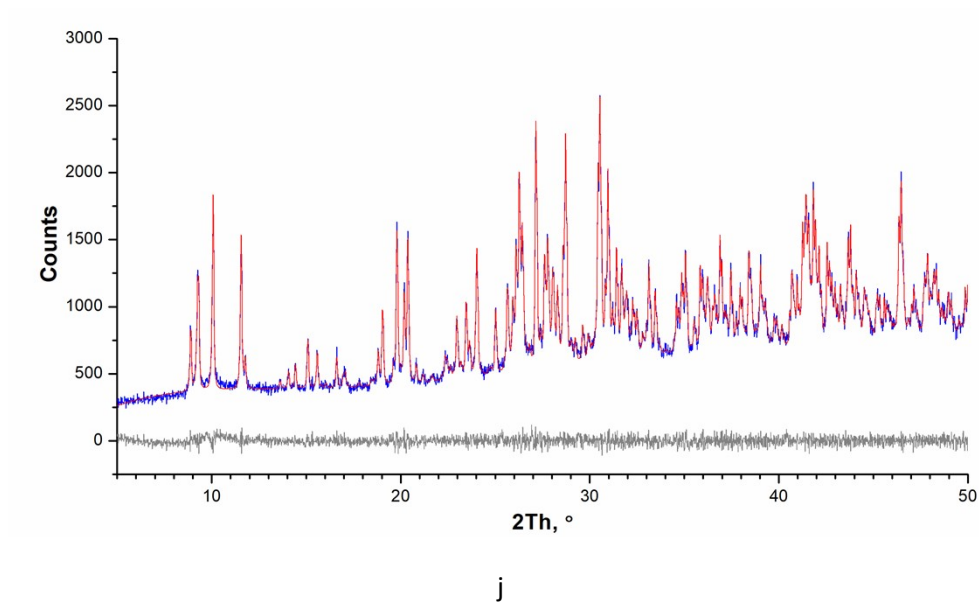

**Fig. S15.** Pawley refinement profiles for **1-10** solid solutions (a-j) obtained from aqueous solutions. All profiles were recorded at RT. Red and blue lines correspond to the calculated profile and experimental pattern respectively. The bottom trace shows the difference curve.

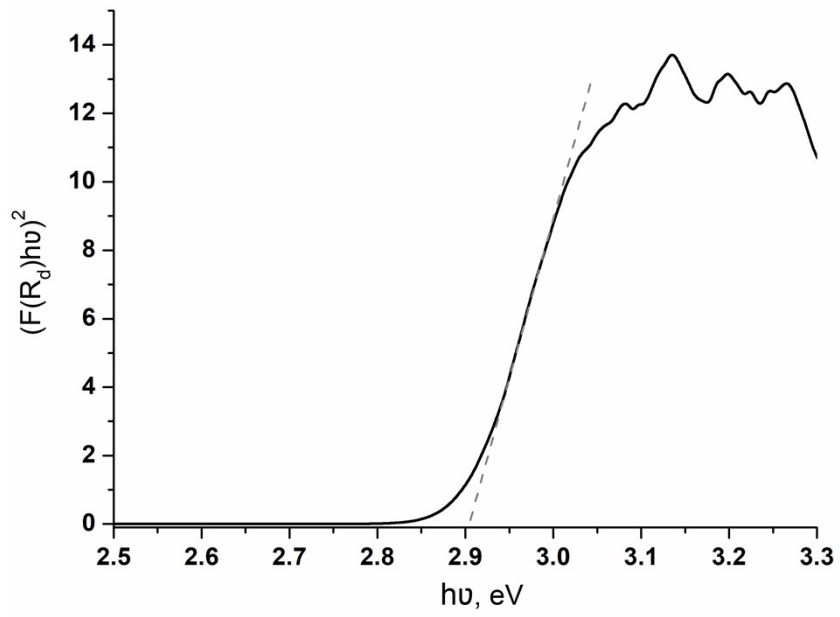

a (1,  $I_{\text{EDX}} = 0.6\%$ ,  $E_g = 2.90$  eV)

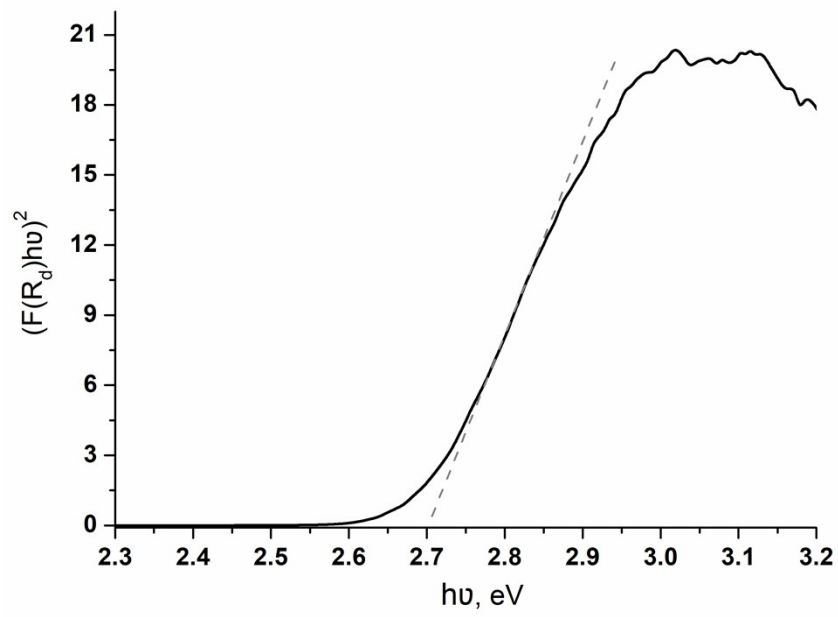

b (2,  $I_{\text{EDX}} = 9.6\%$ ,  $E_g = 2.70$  eV)

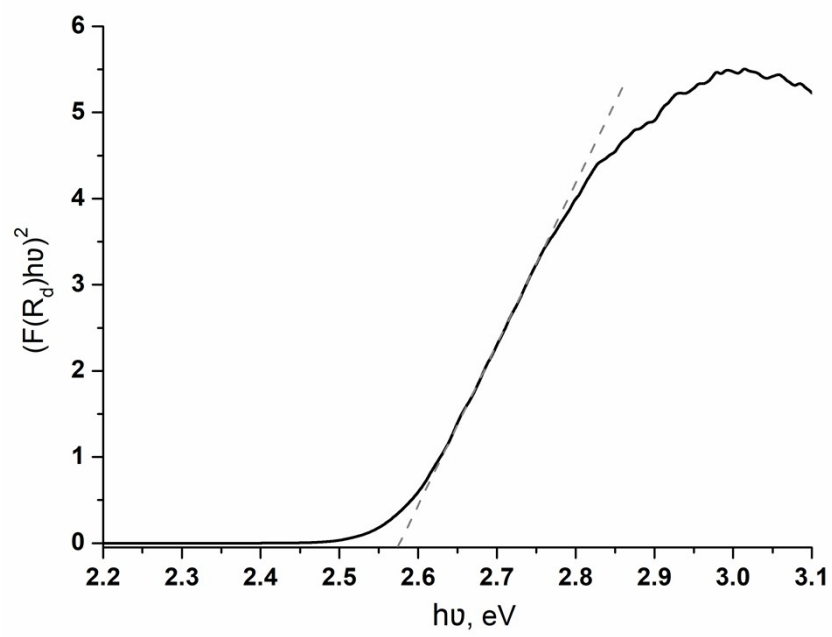

c (3,  $I_{\text{EDX}} = 20.2\%$ ,  $E_g = 2.58 \text{ eV}$ )

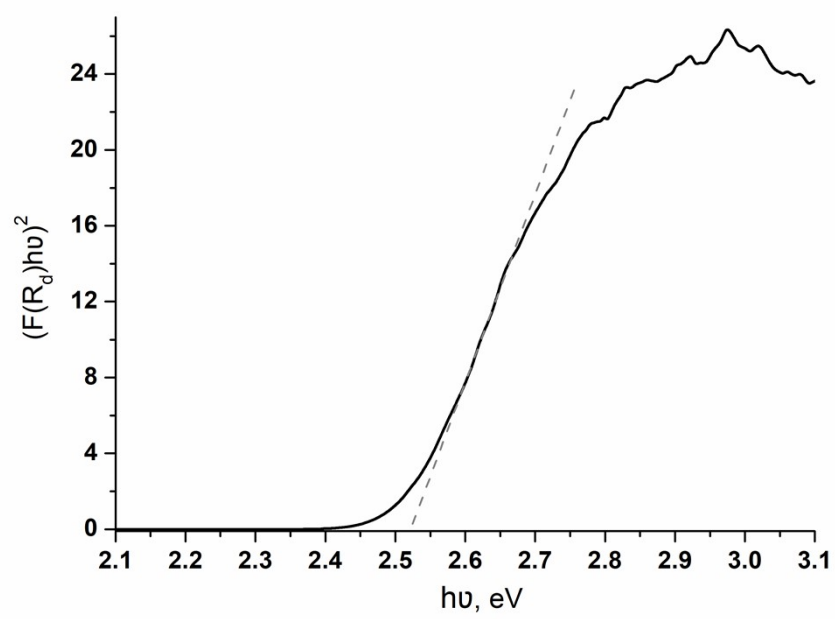

d (4,  $I_{\text{EDX}} = 27.0\%$ ,  $E_g = 2.52 \text{ eV}$ )

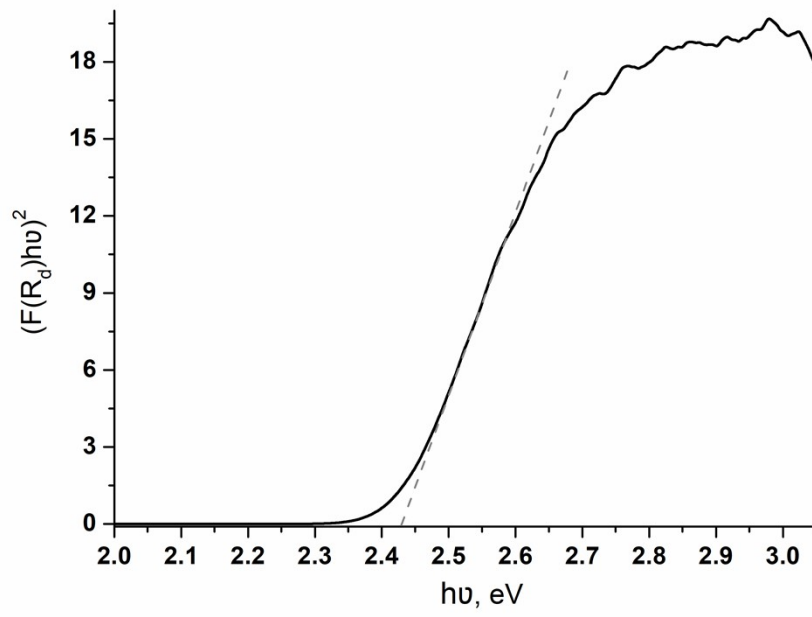

e (5,  $I_{\text{EDX}} = 42.0\%$ ,  $E_g = 2.43$  eV)

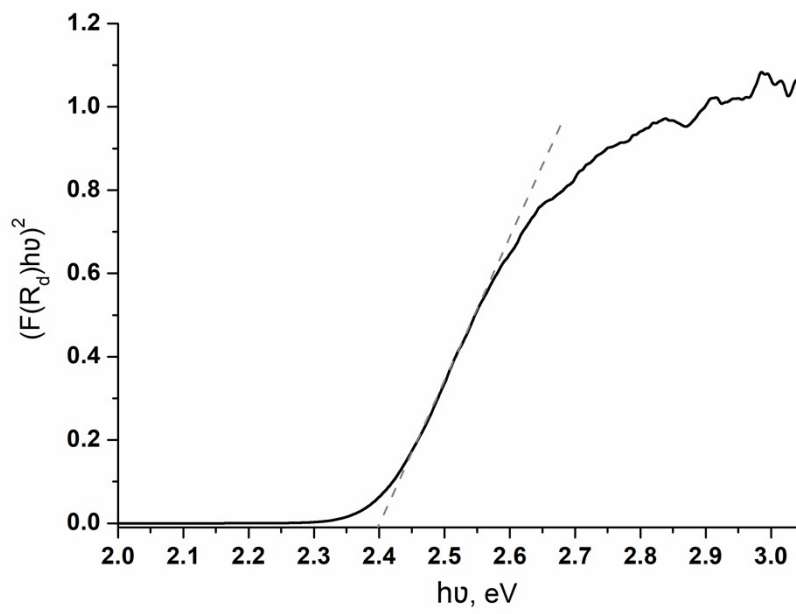

f (6,  $I_{\text{EDX}} = 38.0\%$ ,  $E_g = 2.40$  eV)

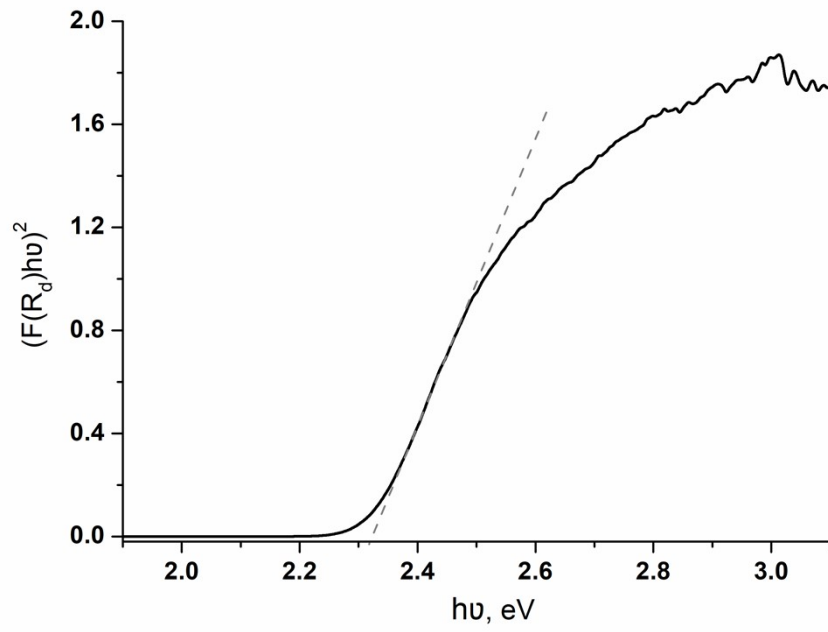

g (7,  $I_{\text{EDX}} = 50.2\%$ ,  $E_g = 2.32 \text{ eV}$ )

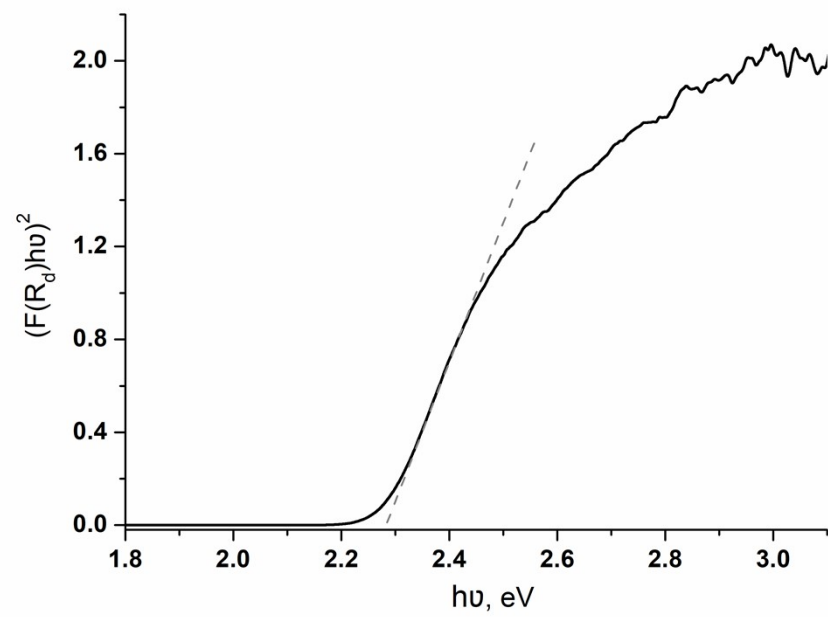

h (8,  $I_{\text{EDX}} = 55.6\%$ ,  $E_g = 2.28 \text{ eV}$ )

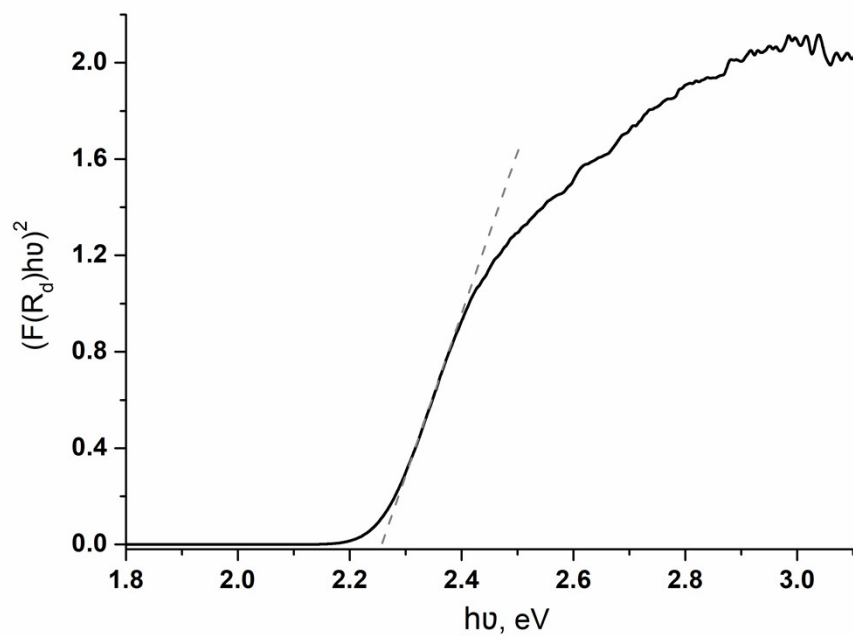

i (9,  $I_{\text{EDX}} = 59.8\%$ ,  $E_g = 2.16$  eV)

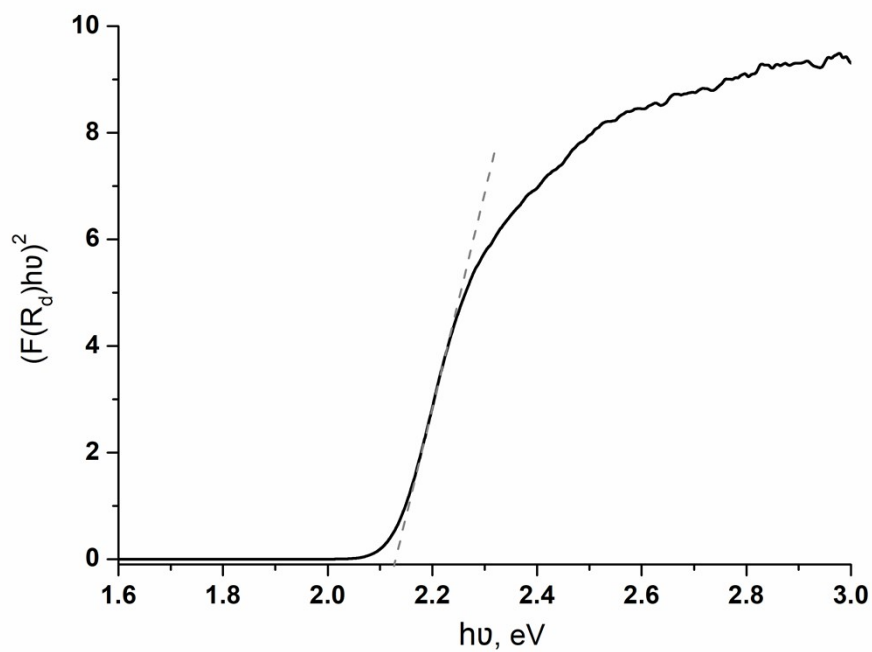

j (10,  $I_{\text{EDX}} = 98.9\%$ ,  $E_g = 2.13$  eV)

**Fig. S16.** Tauc plots of  $[\text{Py}_2(\text{XK})]_2[\text{Bi}_2\text{Br}_{10-x}\text{I}_x]$  solid solutions 1-10 (a-j). The linear part of the plot is extrapolated to the x-axis to determine  $E_g$  values.

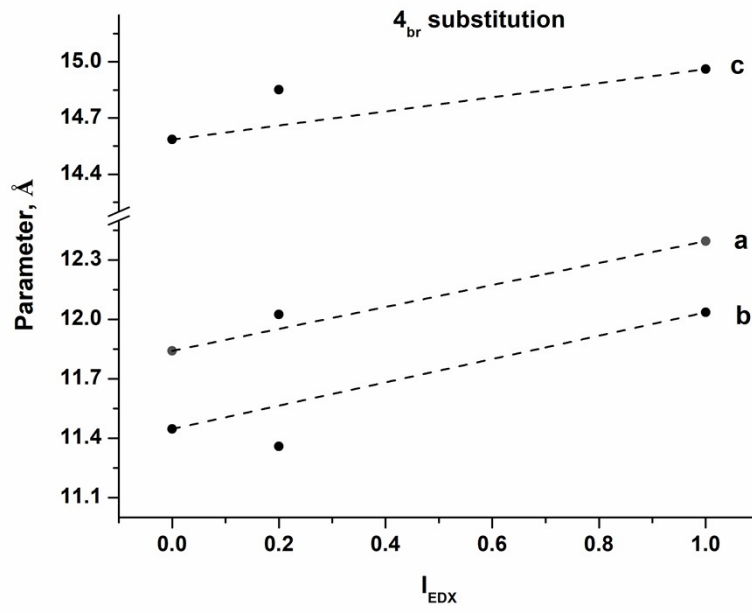

a

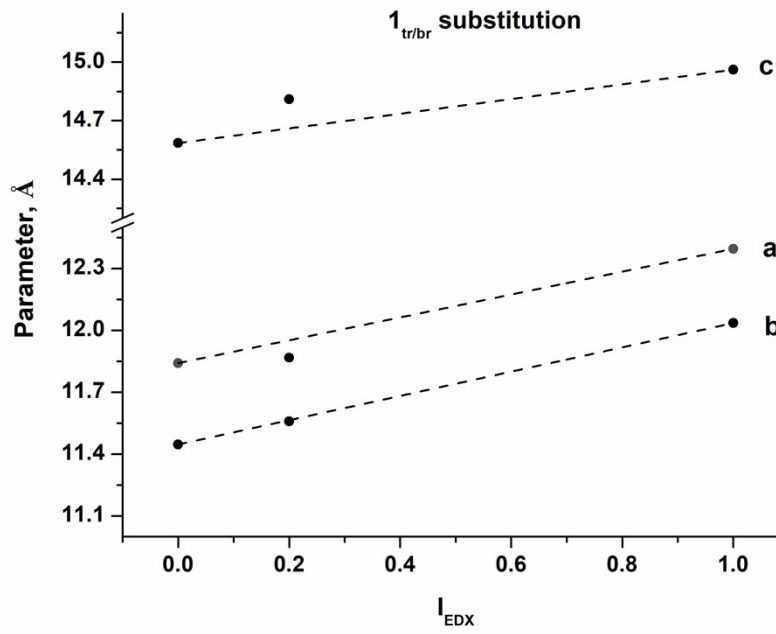

b



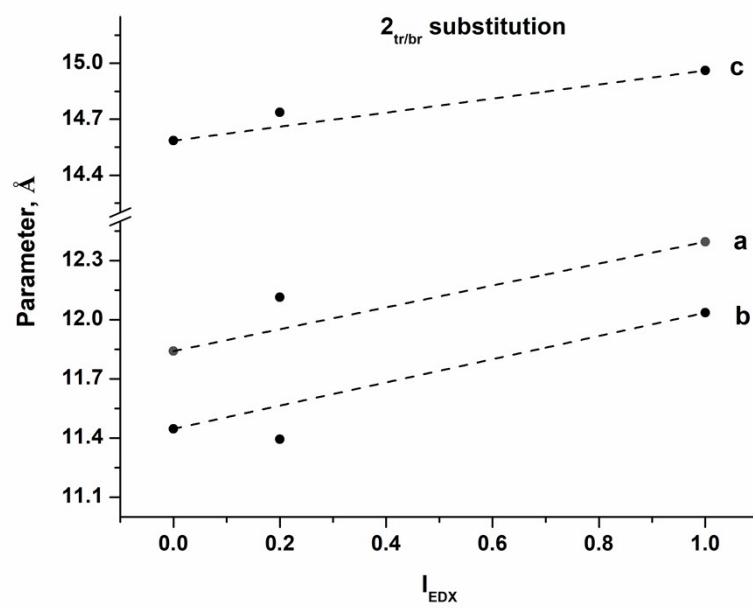

c

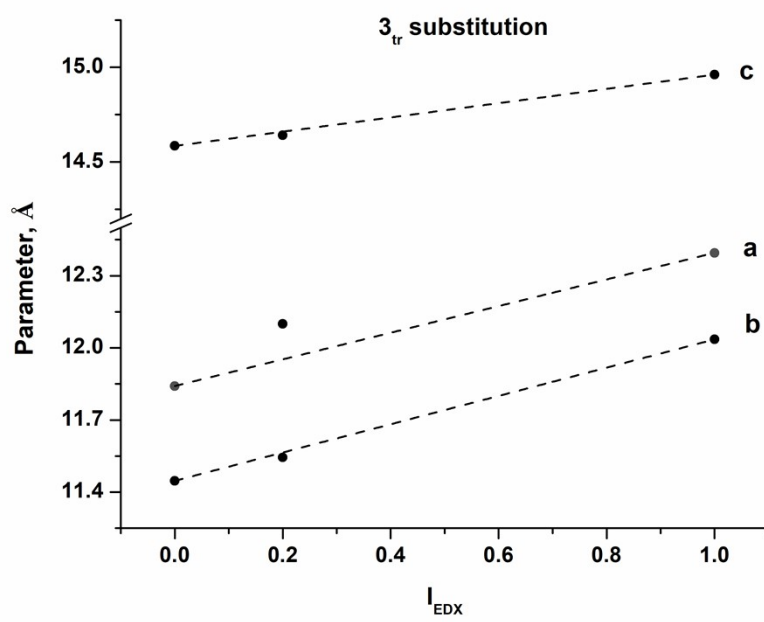

d

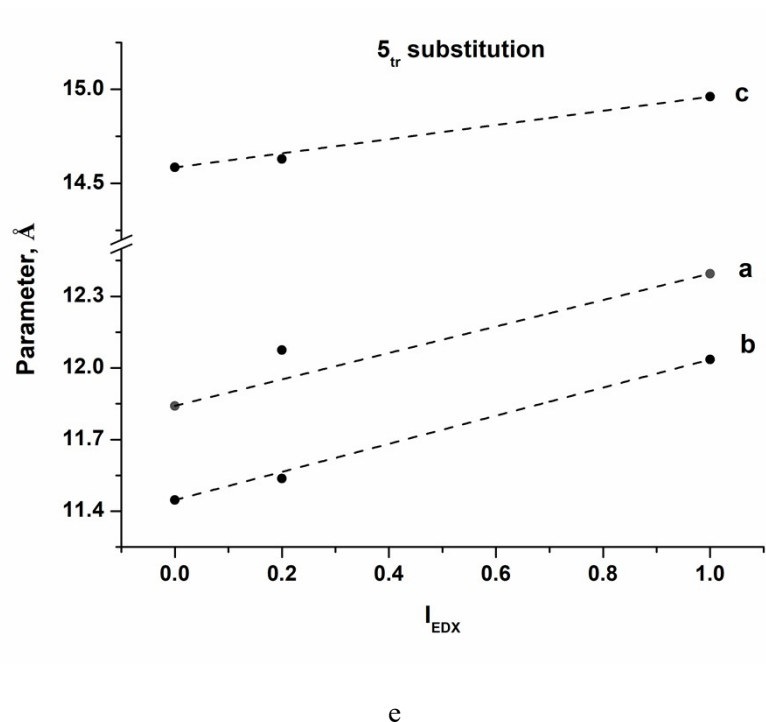

**Fig. S17.** Dependence of crystal lattice parameters on the composition of model compounds  $[4\text{-Pi}_2\text{C}_2]_2[\text{Bi}_2\text{Br}_8\text{I}_2]$ , where iodine atoms occupy the  $4_{\text{br}}$  bridge (a),  $1_{\text{tr/br}}$  (b) and  $2_{\text{tr/br}}$  (c) term/bridge and  $3_{\text{tr}}$  (d) and  $5_{\text{tr}}$  (e) term/term positions. Fitting curves are shown for visual convenience and have no physical sense.

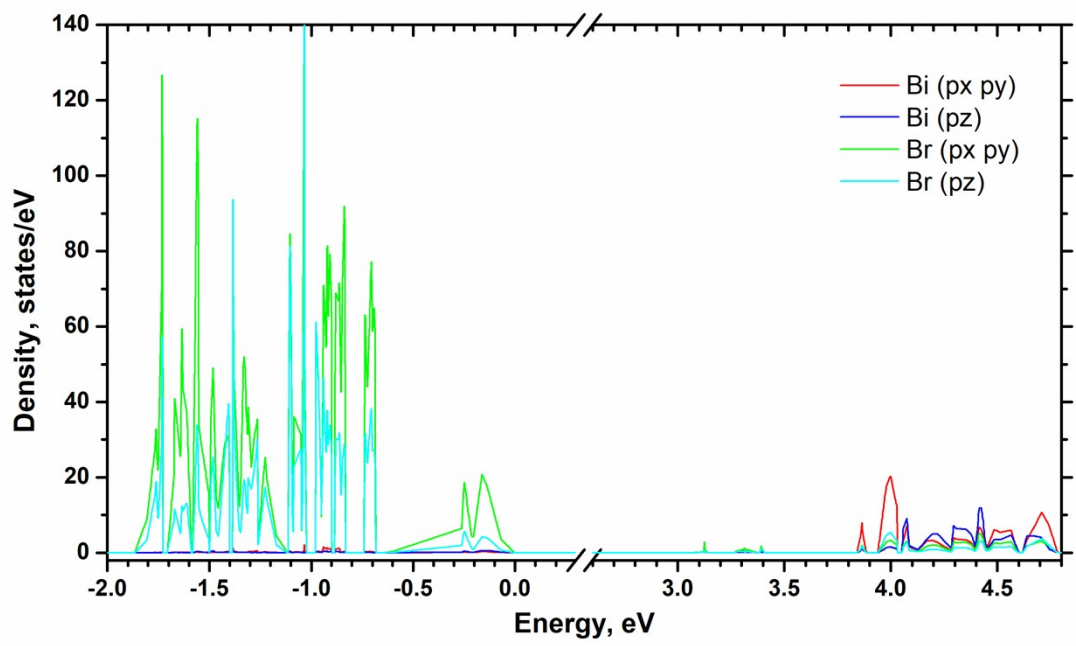

a

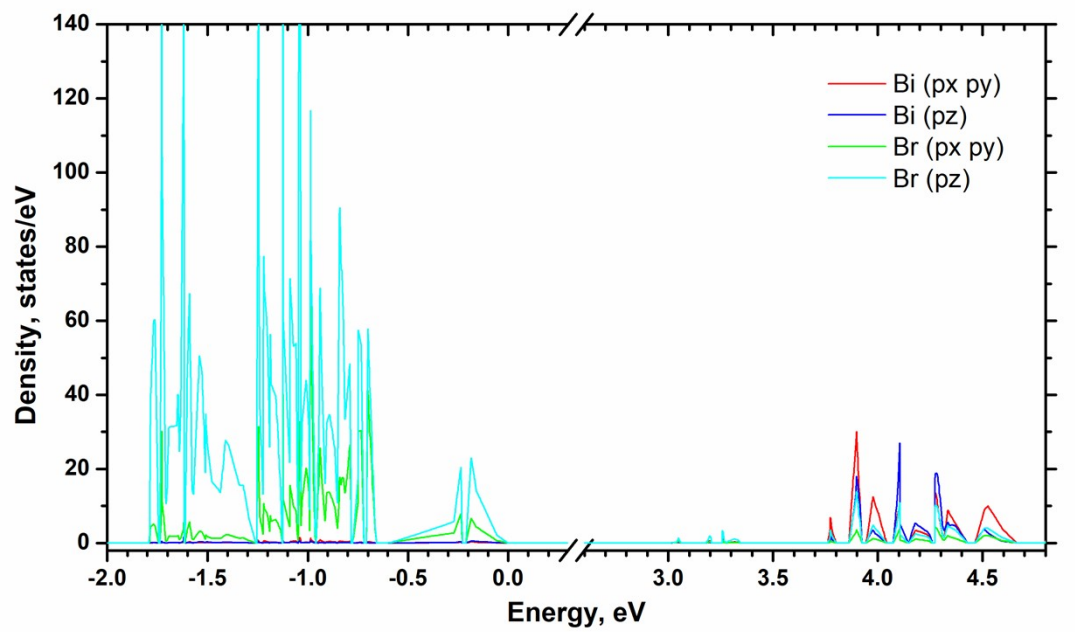

b

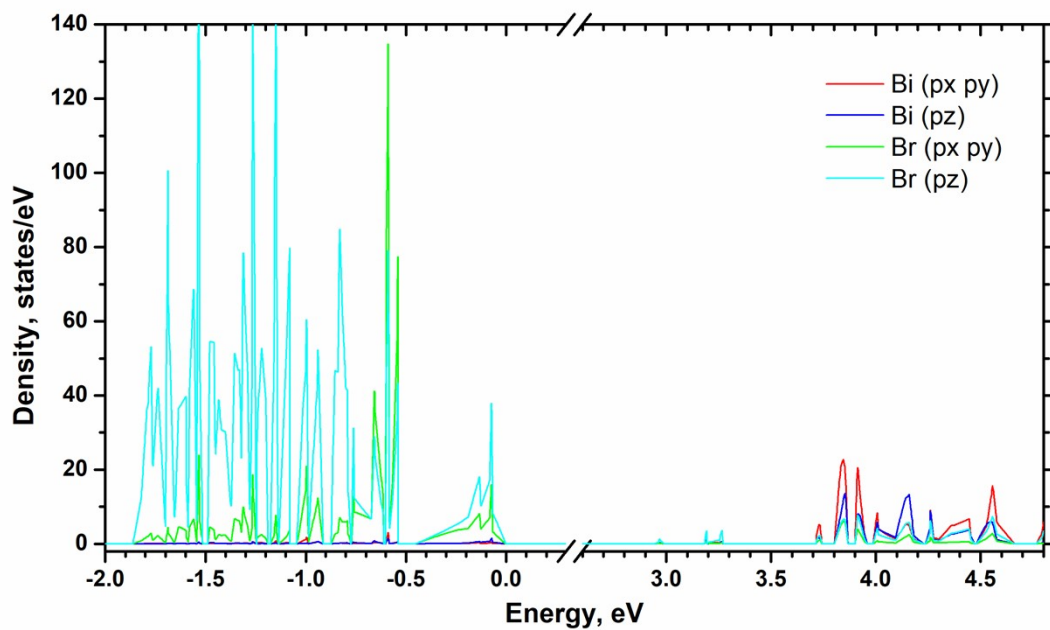

c

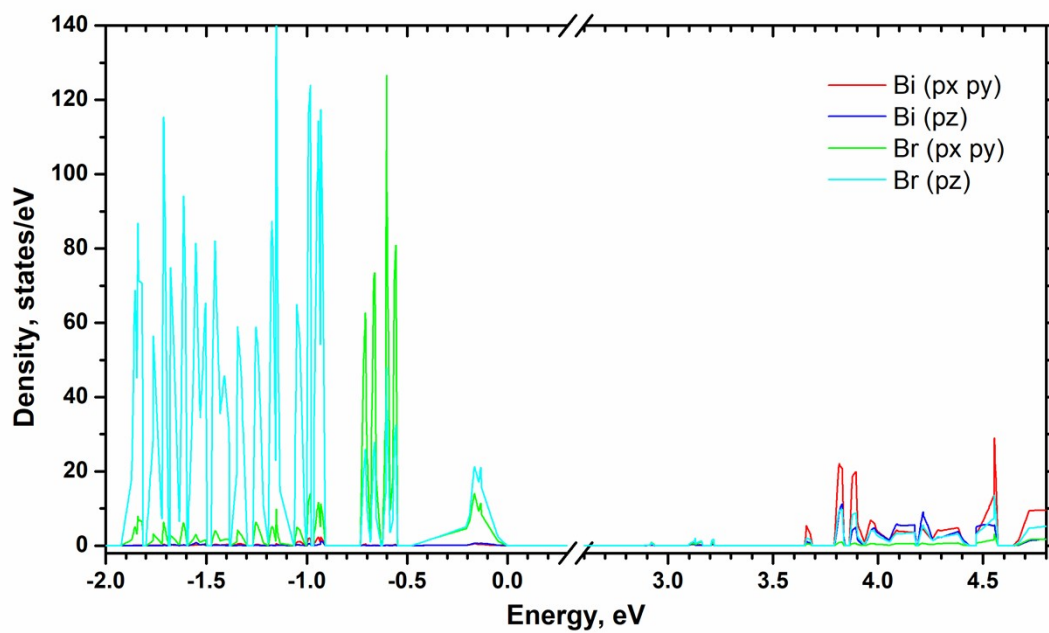

d

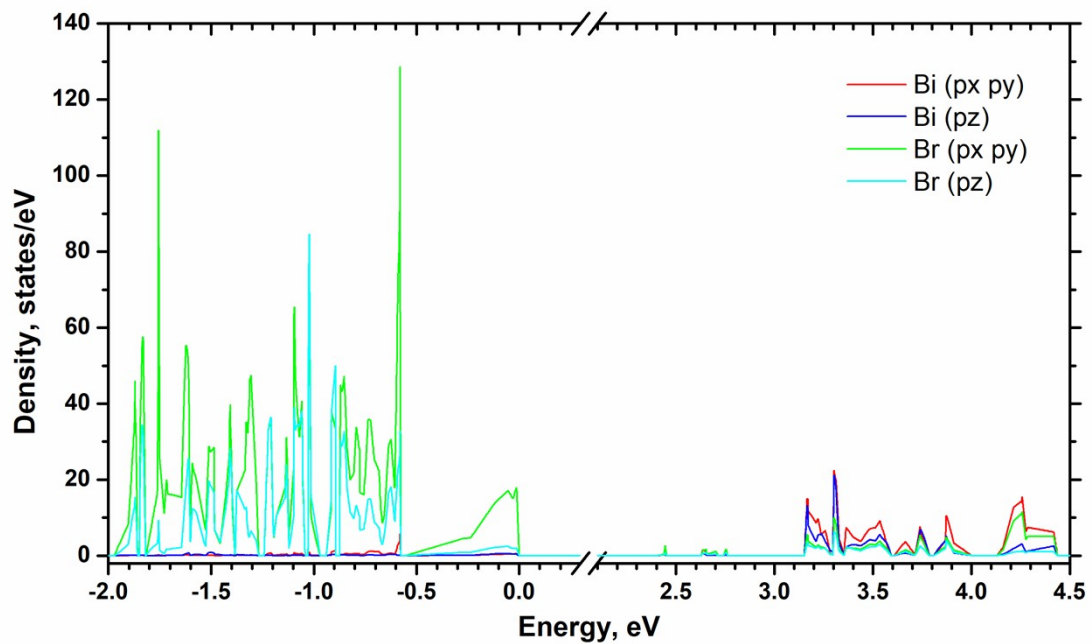

e

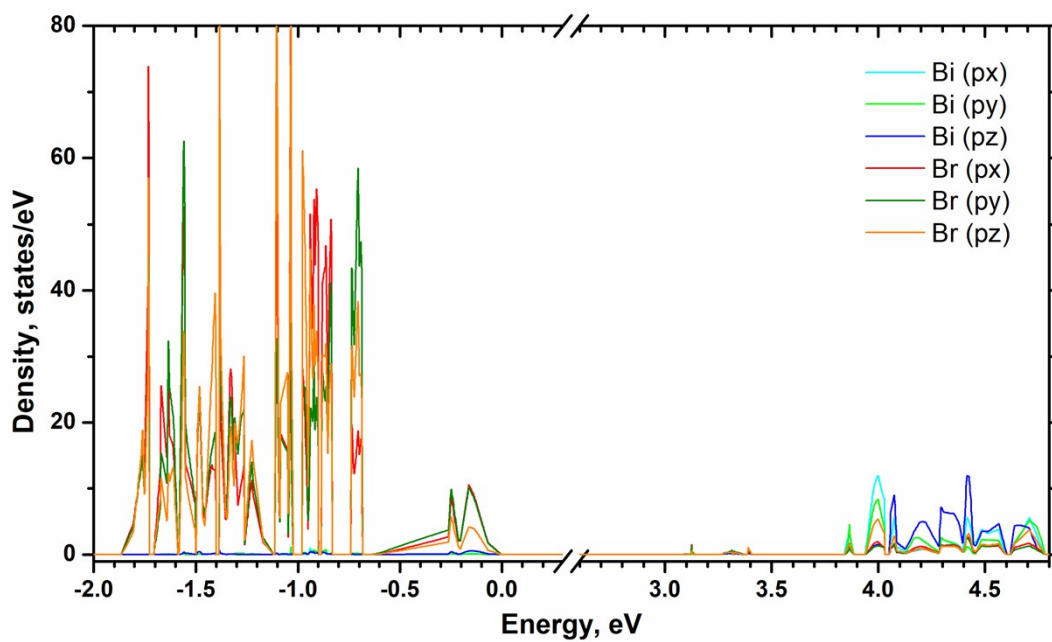

f

Fig. S18. Density of states of 1 (a, f),  $4_{br}$  (b),  $1_{tr/br}$  (c),  $3_{tr}$  (d) and 10 (e).

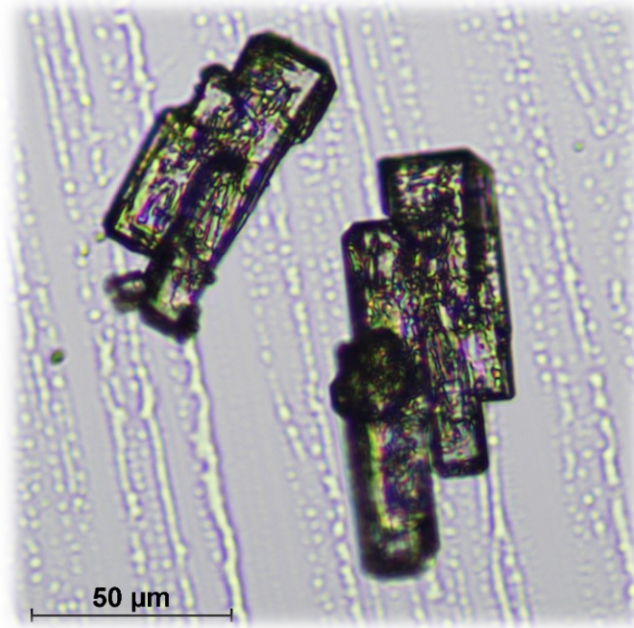

a

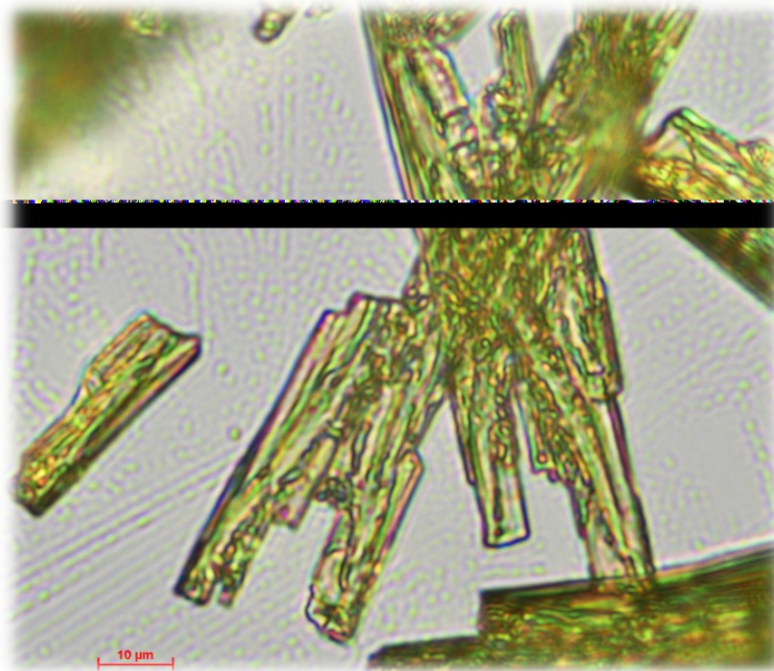

b



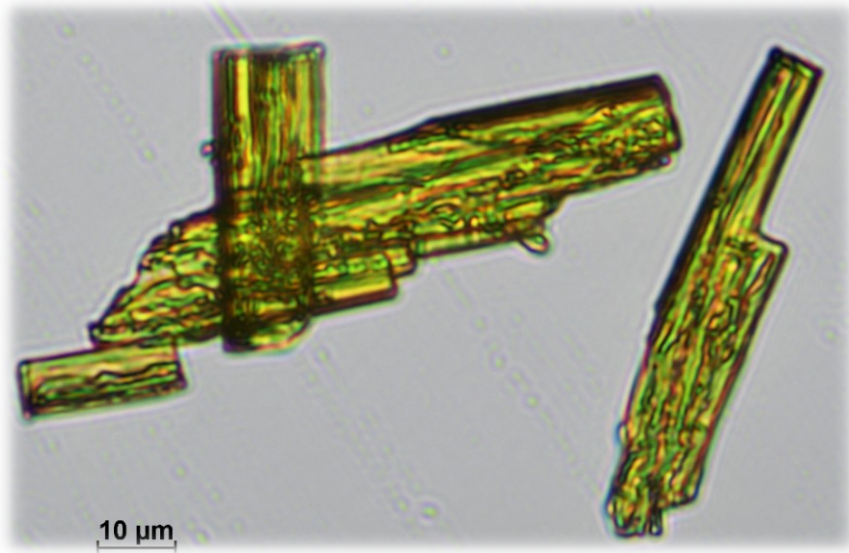

c

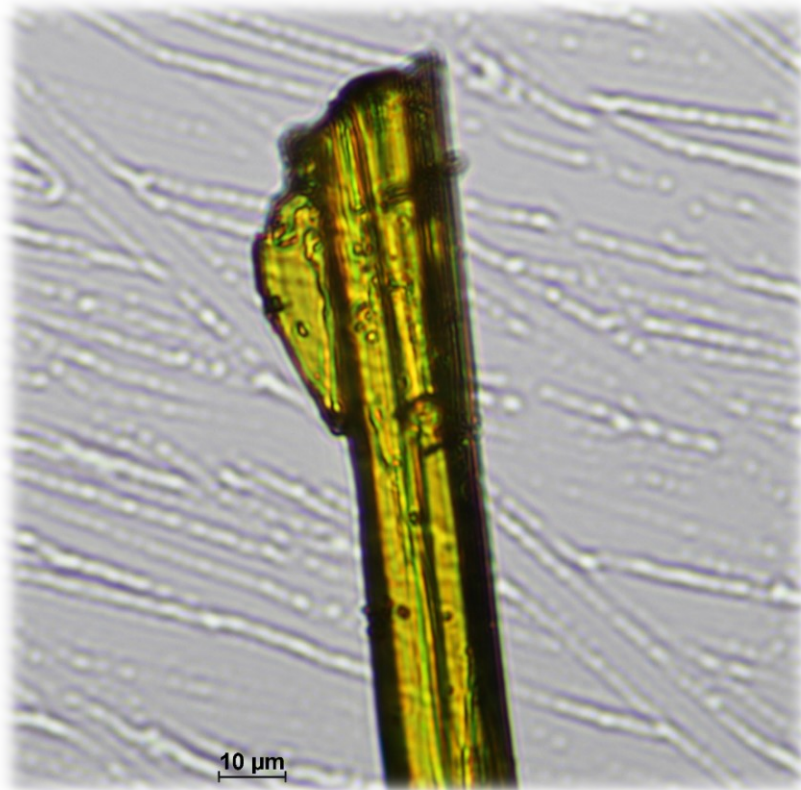

d

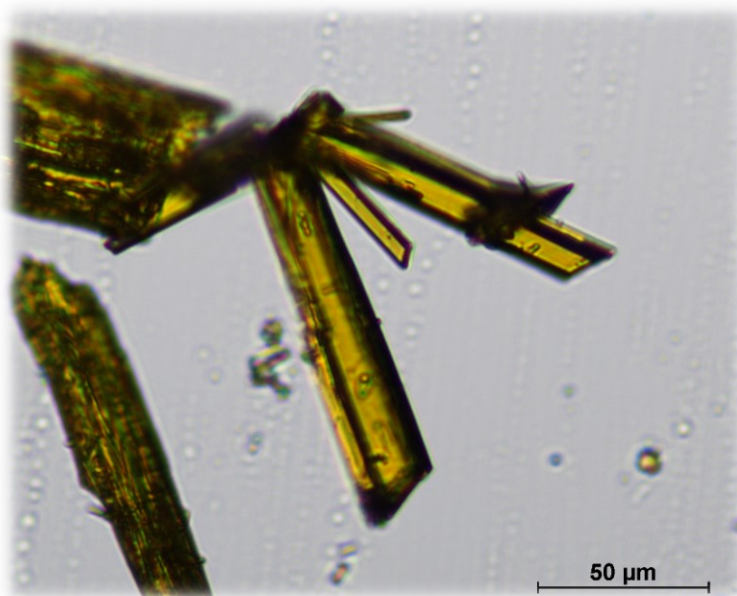

e

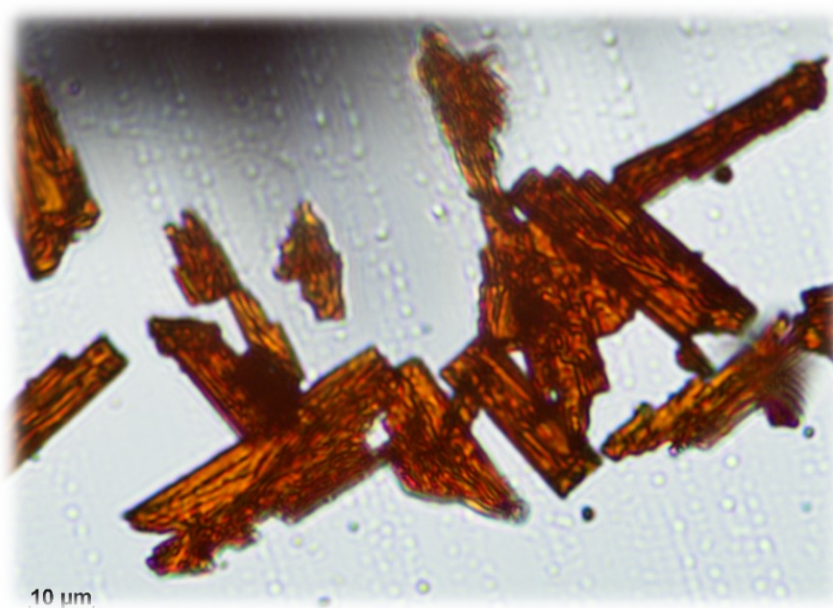

f

**Fig. S19.** Crystals of solid solutions 1-5 (a-e) and 10 (f).
